# Supplementary material for: Tracking vegetation phenology of pristine northern boreal peatlands by combining digital photography with CO 2 flux and remote sensing data
Source: Copernicus journal article supplement (doi:10.5194/bg-2022-58), 2022-03-15
Supplement: Supplementary file 1 [file bg-2022-58-supplement-version2.pdf]

## Supplementary Material

**Table S1: The monthly mean air temperatures and precipitations sums during the measurement years compared to the climate normal period 1981 – 2010. The data were obtained from the nearby weather observation stations of the Finnish Meteorological Institute.**

### Halssiaapa

| Monthly mean air temperature (°C) |              |              |             |             |            |             |             |             |            |            |             |              |
|-----------------------------------|--------------|--------------|-------------|-------------|------------|-------------|-------------|-------------|------------|------------|-------------|--------------|
|                                   | 1            | 2            | 3           | 4           | 5          | 6           | 7           | 8           | 9          | 10         | 11          | 12           |
| 2015                              | -14.1        | -6.5         | -2.3        | 0.9         | 6.3        | 10.2        | 12          | 13.5        | 9.5        | 0.6        | -2.5        | -8.9         |
| 2016                              | -18.1        | -6.3         | -4          | 1.1         | 9          | 12          | 16.8        | 12.2        | 8.5        | 1.7        | -6.1        | -9.1         |
| 2017                              | -10.2        | -10.1        | -5.6        | -2.5        | 2.6        | 10.3        | 15.1        | 11.9        | 7.2        | 0.4        | -5.5        | -10.1        |
| 2018                              | -11.7        | -14.9        | -10.4       | 0.2         | 10.2       | 11          | 20.1        | 13.6        | 7.8        | -0.4       | -0.8        | -8.5         |
| 2019                              | -16.8        | -11.7        | -7.2        | 1.7         | 5.4        | 12.5        | 13.5        | 12.3        | 7.3        | -2.5       | -8.5        | -5.6         |
| <b>Mean 1981-2010</b>             | <b>-13.5</b> | <b>-12.7</b> | <b>-7.5</b> | <b>-1.3</b> | <b>5.3</b> | <b>11.6</b> | <b>14.5</b> | <b>11.7</b> | <b>6.2</b> | <b>0.1</b> | <b>-7.1</b> | <b>-11.7</b> |

| Monthly precipitation sum (mm) |             |             |             |             |             |             |             |             |             |             |             |             |
|--------------------------------|-------------|-------------|-------------|-------------|-------------|-------------|-------------|-------------|-------------|-------------|-------------|-------------|
|                                | 1           | 2           | 3           | 4           | 5           | 6           | 7           | 8           | 9           | 10          | 11          | 12          |
| 2015                           | 49.5        | 17          | 48.2        | 10.4        | 101.6       | 71.1        | 89          | 53.8        | 72          | 37.8        | 71.8        | 40.7        |
| 2016                           | 29.2        | 64.9        | 8.3         | 39.7        | 35.2        | 112.9       | 110.8       | 68.4        | 75.6        | 9.1         | 49          | 33.5        |
| 2017                           | 24.1        | 14.9        | 26.6        | 28.2        | 9.3         | 36.5        | 83.5        | 57.6        | 27.1        | 41.5        | 54.6        | 39.5        |
| 2018                           | 45.2        | 4.1         | 15.6        | 46.7        | 10.9        | 42.3        | 61.4        | 75.9        | 78.5        | 30.4        | 16.9        | 44.3        |
| 2019                           | 28.3        | 36.5        | 66.6        | 6.4         | 53.2        | 71.3        | 28.2        | 27.4        | 35.9        | 66.7        | 38          | 68.9        |
| <b>Mean 1981-2010</b>          | <b>34.4</b> | <b>29.5</b> | <b>30.5</b> | <b>29.0</b> | <b>40.9</b> | <b>55.6</b> | <b>74.3</b> | <b>65.6</b> | <b>49.0</b> | <b>46.4</b> | <b>39.2</b> | <b>33.9</b> |

Data from weather station: Sodankylä Tähtelä

### Lompolojänkkä

| Monthly mean air temperature (°C) |              |              |             |             |            |             |             |             |            |             |             |              |
|-----------------------------------|--------------|--------------|-------------|-------------|------------|-------------|-------------|-------------|------------|-------------|-------------|--------------|
|                                   | 1            | 2            | 3           | 4           | 5          | 6           | 7           | 8           | 9          | 10          | 11          | 12           |
| 2015                              | -14.7        | -7.8         | -3.2        | 0.5         | 5.1        | 9.7         | 11.9        | 13.1        | 8.9        | -0.1        | -3.3        | -10.2        |
| 2016                              | -19.4        | -9.2         | -5.3        | 0.3         | 8.7        | 11          | 15.4        | 10.8        | 8.5        | 0.7         | -7.8        | -9.9         |
| 2017                              | -11.2        | -11.1        | -7.1        | -2.8        | 2.5        | 10.3        | 13.6        | 11.1        | 7          | -0.6        | -7.3        | -13.2        |
| 2018                              | -14.8        | -15.7        | -12.4       | -0.6        | 9.1        | 9.8         | 19.1        | 12.5        | 7.2        | -1.3        | -2          | -10.4        |
| 2019                              | -18.1        | -13.5        | -8.3        | 1.6         | 5.5        | 11.6        | 13.8        | 12.6        | 6.5        | -3.7        | -10.8       | -7.2         |
| <b>Mean 1981-2010</b>             | <b>-14.2</b> | <b>-13.1</b> | <b>-7.9</b> | <b>-1.6</b> | <b>4.9</b> | <b>10.9</b> | <b>13.8</b> | <b>11.2</b> | <b>5.6</b> | <b>-0.9</b> | <b>-8.8</b> | <b>-12.5</b> |

| Monthly precipitation sum (mm) |             |             |             |             |             |             |             |             |             |             |             |             |
|--------------------------------|-------------|-------------|-------------|-------------|-------------|-------------|-------------|-------------|-------------|-------------|-------------|-------------|
|                                | 1           | 2           | 3           | 4           | 5           | 6           | 7           | 8           | 9           | 10          | 11          | 12          |
| 2015                           | 42.2        | 22.9        | 32.4        | 28.2        | 85.7        | 69.9        | 57.7        | 59.1        | 56.8        | 22.5        | 40.9        | 37.3        |
| 2016                           | 27.6        | 41.8        | 9.2         | 25.7        | 13.2        | 122.7       | 107.9       | 117.4       | 62          | 6.3         | 38.1        | 28          |
| 2017                           | 32.8        | 18.6        | 20.5        | 19.2        | 20.6        | 29.1        | 94          | 97.6        | 22.7        | 36.3        | 47.3        | 30.5        |
| 2018                           | 25.8        | 0.8         | 7.8         | 19.9        | 18.7        | 45          | 10.4        | 86.7        | 61          | 28.1        | 13.6        | 43          |
| 2019                           | 17.3        | 25.3        | 27.6        | 7.9         | 66.5        | 71.7        | 24          | 39.3        | 71          | 29.6        | 29.2        | 57.3        |
| <b>Mean 1981-2010</b>          | <b>31.0</b> | <b>26.6</b> | <b>28.0</b> | <b>27.3</b> | <b>39.9</b> | <b>58.7</b> | <b>75.4</b> | <b>74.0</b> | <b>48.4</b> | <b>45.1</b> | <b>36.0</b> | <b>30.4</b> |

Data from weather stations: Muonio and Alamuonio

### Kaamanen

| Monthly mean air temperature (°C) |              |              |             |             |            |             |             |             |            |            |             |              |
|-----------------------------------|--------------|--------------|-------------|-------------|------------|-------------|-------------|-------------|------------|------------|-------------|--------------|
|                                   | 1            | 2            | 3           | 4           | 5          | 6           | 7           | 8           | 9          | 10         | 11          | 12           |
| 2015                              | -14.8        | -6.8         | -2.2        | 0.9         | 5.9        | 9.8         | 10.8        | 13.3        | 9.4        | 0.7        | -2.5        | -8           |
| 2016                              | -17          | -7           | -3.8        | 0.9         | 8.8        | 11          | 15.8        | 11.3        | 8.4        | 1.9        | -5.2        | -7.3         |
| 2017                              | -9.1         | -10.1        | -5.7        | -2.6        | 2.3        | 8.7         | 14.6        | 11.3        | 7          | 0.9        | -5.9        | -11          |
| 2018                              | -12.9        | -13.1        | -11         | -0.4        | 8.9        | 10.1        | 19.4        | 12.9        | 7.9        | 0.1        | -0.6        | -7.8         |
| 2019                              | -13.8        | -12.2        | -7.4        | 1.8         | 4.4        | 10.4        | 12.6        | 11.5        | 7.4        | -2.6       | -8.8        | -5.8         |
| <b>Mean 1981-2010</b>             | <b>-12.8</b> | <b>-12.0</b> | <b>-7.4</b> | <b>-1.6</b> | <b>4.4</b> | <b>10.6</b> | <b>14.0</b> | <b>11.3</b> | <b>6.2</b> | <b>0.1</b> | <b>-7.1</b> | <b>-11.1</b> |

| Monthly precipitation sum (mm) |             |             |             |             |             |             |             |             |             |             |             |             |
|--------------------------------|-------------|-------------|-------------|-------------|-------------|-------------|-------------|-------------|-------------|-------------|-------------|-------------|
|                                | 1           | 2           | 3           | 4           | 5           | 6           | 7           | 8           | 9           | 10          | 11          | 12          |
| 2015                           | 13.8        | 17.9        | 22.1        | 17.8        | 60.2        | 70.1        | 48.8        | 50.6        | 69          | 17.1        | 29.4        | 32.2        |
| 2016                           | 31.4        | 48.6        | 10.3        | 25.9        | 34.7        | 104.1       | 80.6        | 146.3       | 68.6        | 10.9        | 44.1        | 47.9        |
| 2017                           | 18.1        | 21.4        | 25          | 24.1        | 6           | 72.7        | 130         | 96.7        | 51.8        | 29.9        | 50.9        | 41.6        |
| 2018                           | 35.9        | 4.8         | 17.6        | 32.3        | 34.6        | 52.4        | 44.8        | 134.7       | 84.8        | 27.5        | 32.8        | 31.8        |
| 2019                           | 23.7        | 39.5        | 22.5        | 3.2         | 76.8        | 103.8       | 37.7        | 54.5        | 61.3        | 40.8        | 27.9        | 57          |
| <b>Mean 1981-2010</b>          | <b>24.5</b> | <b>23.0</b> | <b>23.4</b> | <b>27.9</b> | <b>38.4</b> | <b>50.3</b> | <b>71.5</b> | <b>67.6</b> | <b>45.7</b> | <b>40.3</b> | <b>29.5</b> | <b>24.1</b> |

Data from weather stations: Inari Ivalo

**Table S2.** The significant differences in GCC between the sites (Halssiaapa (Hal), Lompolojänkkä (Lom) and Kaamanen (Kaa)) during the measurement years as a pairwise comparison (Dunn's test). The significance values were adjusted by the Holm correction for multiple tests. Z denotes the test statistic.

|           | 2015  |         | 2016  |         | 2017  |         | 2018  |         | 2019  |         |
|-----------|-------|---------|-------|---------|-------|---------|-------|---------|-------|---------|
|           | Z     | p-value |
| Lom - Hal | -3.57 | 0.001   | -5.90 | <0.001  | -4.95 | <0.001  | -6.92 | <0.001  | -4.20 | <0.001  |
| Lom - Kaa | -2.30 | 0.043   | -5.11 | <0.001  | -1.79 | 0.074   | -2.81 | 0.005   | -1.49 | 0.137   |
| Hal - Kaa | -1.25 | 0.212   | -0.62 | 0.538   | -3.21 | 0.003   | -4.15 | <0.001  | -2.89 | 0.008   |

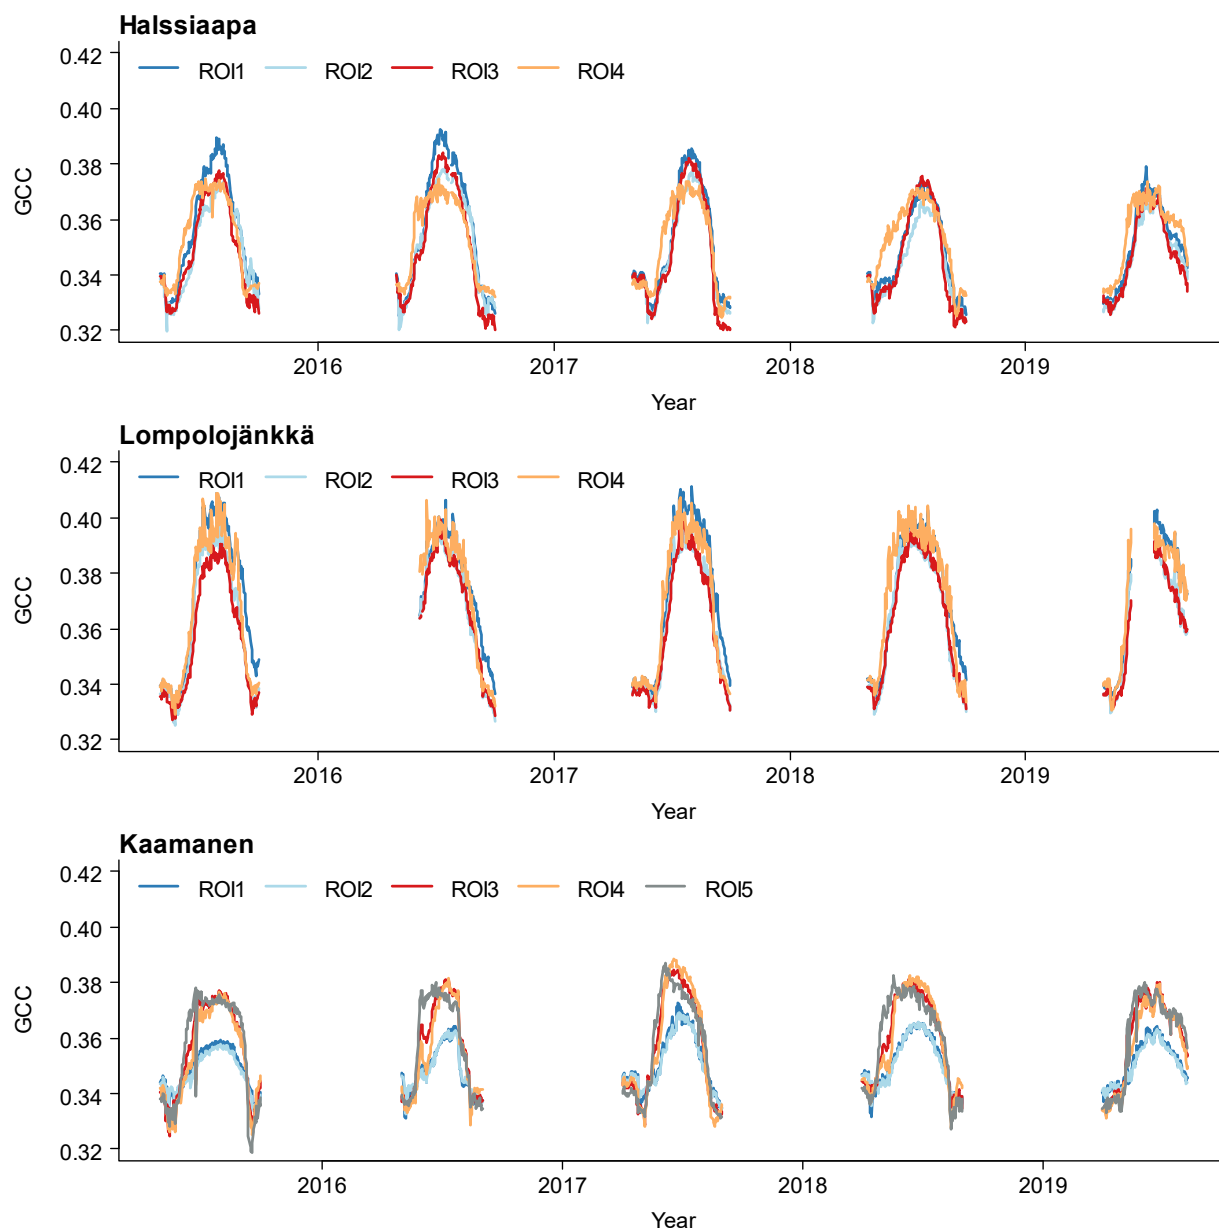

**Figure S1:** The GCC of the different Region of Interests (ROIs) of specific plant communities. The numbers 1-5 indicate the different plant communities detailed in Table 1.

Table S3: The significant differences between different plant communities as groupwise comparison (Kruskal-Wallis one-way analysis of variance on ranks).  $\chi^2$  denotes the chi-squared test statistic.

| Halssiaapa |          |                      | Lompolojänkkä |          |                      | Kaamanen |          |                       |
|------------|----------|----------------------|---------------|----------|----------------------|----------|----------|-----------------------|
| Year       | $\chi^2$ | p-value              | Year          | $\chi^2$ | p-value              | Year     | $\chi^2$ | p-value               |
| 2015       | 19.42    | 2.24x10 <sup>4</sup> | 2015          | 43.47    | 1.96x10 <sup>9</sup> | 2015     | 37.68    | 1.30x10 <sup>7</sup>  |
| 2016       | 7.94     | 0.047                | 2016          | 26.44    | 7.71x10 <sup>6</sup> | 2016     | 26.02    | 3.14x10 <sup>5</sup>  |
| 2017       | 7.70     | 0.053                | 2017          | 33.21    | 2.91x10 <sup>7</sup> | 2017     | 8.12     | 0.087                 |
| 2018       | 35.61    | 9.07x10 <sup>8</sup> | 2018          | 33.97    | 2.01x10 <sup>7</sup> | 2018     | 61.27    | 1.57x10 <sup>12</sup> |
| 2019       | 31.47    | 6.78x10 <sup>7</sup> | 2019          | 29.23    | 2.01x10 <sup>6</sup> | 2019     | 73.3     | 7.40x10 <sup>15</sup> |

Table S4: The significant differences between the different plant communities as a pairwise comparison (Dunn's test). The significance values were adjusted by the Holm correction for multiple tests. Z denotes the test statistic.

|             | 2015  |         | 2016  |         | 2017  |         | 2018  |         | 2019  |         |
|-------------|-------|---------|-------|---------|-------|---------|-------|---------|-------|---------|
|             | Z     | p-value |
| ROI1 - ROI2 | 3.59  | 0.002   | 1.81  | 0.355   | 2.35  | 0.111   | 3.05  | 0.009   | 2.70  | 0.028   |
| ROI1 - ROI3 | 3.56  | 0.002   | 2.76  | 0.034   | 2.31  | 0.105   | 1.56  | 0.236   | 2.41  | 0.047   |
| ROI2 - ROI3 | -0.03 | 0.975   | 0.96  | 0.676   | -0.05 | 0.964   | -1.49 | 0.136   | -0.28 | 0.779   |
| ROI1 - ROI4 | 1.11  | 0.532   | 1.32  | 0.561   | 1.01  | 0.630   | -2.65 | 0.024   | -2.19 | 0.058   |
| ROI2 - ROI4 | -2.47 | 0.053   | -0.49 | 0.627   | -1.35 | 0.710   | -5.70 | <0.001  | -4.88 | <0.001  |
| ROI3 - ROI4 | -2.44 | 0.044   | -1.44 | 0.596   | -1.30 | 0.577   | -4.21 | <0.001  | -4.60 | <0.001  |

  

|             | 2015  |         | 2016  |         | 2017  |         | 2018  |         | 2019  |         |
|-------------|-------|---------|-------|---------|-------|---------|-------|---------|-------|---------|
|             | Z     | p-value |
| ROI1 - ROI2 | 4.20  | <0.001  | 3.81  | 0.001   | 4.50  | <0.001  | 3.76  | <0.001  | 3.94  | <0.001  |
| ROI1 - ROI3 | 6.06  | <0.001  | 3.83  | 0.001   | 4.82  | <0.001  | 3.78  | <0.001  | 4.05  | <0.001  |
| ROI2 - ROI3 | 1.86  | 0.126   | 0.02  | 0.984   | 0.32  | 0.750   | 0.01  | 0.989   | 0.11  | 0.915   |
| ROI1 - ROI4 | 1.61  | 0.108   | 0.40  | 1.000   | 1.45  | 0.297   | -0.67 | 1.000   | 0.37  | 1.000   |
| ROI2 - ROI4 | -2.59 | 0.028   | -3.42 | 0.002   | -3.06 | 0.007   | -4.43 | <0.001  | -3.57 | 0.001   |
| ROI3 - ROI4 | -4.45 | <0.001  | -3.44 | 0.002   | -3.37 | 0.003   | -4.45 | <0.001  | -3.68 | 0.001   |

  

|             | 2015  |         | 2016  |         | 2017  |         | 2018  |         | 2019  |         |
|-------------|-------|---------|-------|---------|-------|---------|-------|---------|-------|---------|
|             | Z     | p-value |
| ROI1 - ROI2 | 0.89  | 0.742   | -0.35 | 1.000   | 0.46  | 1.000   | 0.23  | 1.000   | 0.55  | 1.000   |
| ROI1 - ROI3 | -3.52 | 0.003   | -3.69 | 0.002   | -1.51 | 0.782   | -4.86 | <0.001  | -5.36 | <0.001  |
| ROI2 - ROI3 | -4.42 | <0.001  | -3.34 | 0.006   | -1.98 | 0.433   | -5.10 | <0.001  | -5.91 | <0.001  |
| ROI1 - ROI4 | -2.42 | 0.078   | -2.63 | 0.051   | -1.77 | 0.534   | -4.95 | <0.001  | -3.98 | <0.001  |
| ROI2 - ROI4 | -3.31 | 0.006   | -2.28 | 0.112   | -2.24 | 0.254   | -5.19 | <0.001  | -4.53 | <0.001  |
| ROI3 - ROI4 | 1.10  | 0.808   | 1.06  | 0.867   | -0.26 | 1.000   | -0.09 | 1.000   | 1.38  | 0.500   |
| ROI1 - ROI5 | -4.03 | <0.001  | -3.75 | 0.002   | -1.42 | 0.784   | -4.98 | <0.001  | -5.83 | <0.001  |
| ROI2 - ROI5 | -4.93 | <0.001  | -3.40 | 0.005   | -1.88 | 0.482   | -5.22 | <0.001  | -6.38 | <0.001  |
| ROI3 - ROI5 | -0.51 | 0.610   | -0.06 | 0.952   | 0.10  | 0.923   | -0.12 | 1.000   | -0.47 | 0.638   |
| ROI4 - ROI5 | -1.61 | 0.425   | -1.12 | 1.000   | 0.36  | 1.000   | -0.03 | 0.975   | -1.85 | 0.256   |

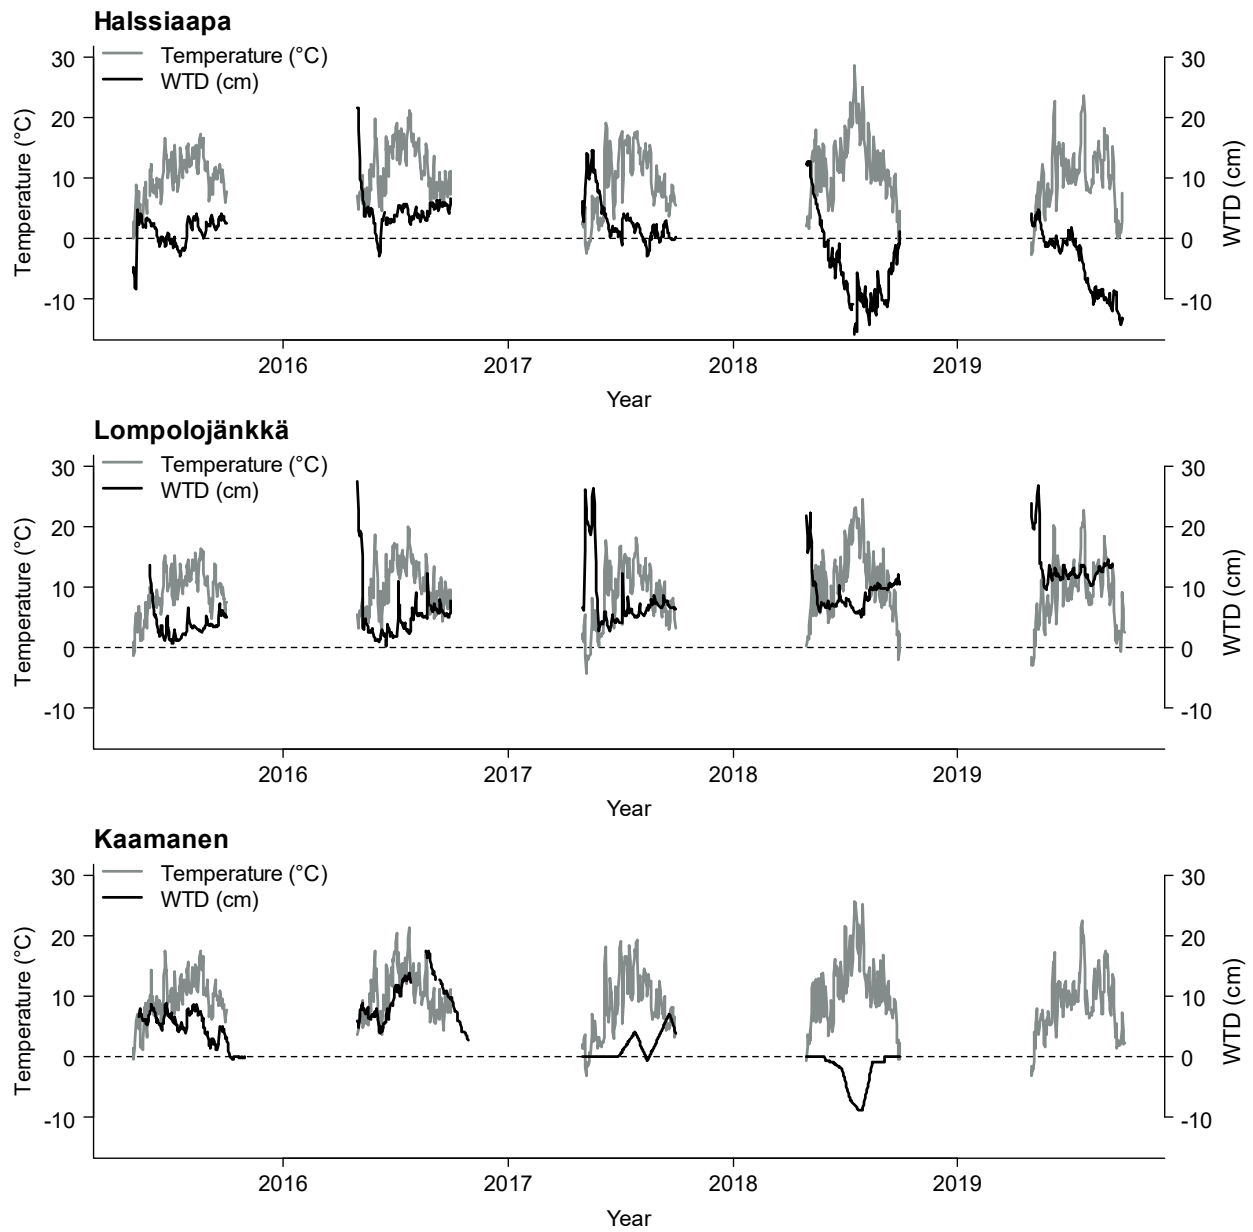

**Figure S2: Daily mean temperatures (°C) and water table depths (WTD, cm) in 2015–2019 at the experimental sites. The WTD data from Kaamanen are missing in 2019.**

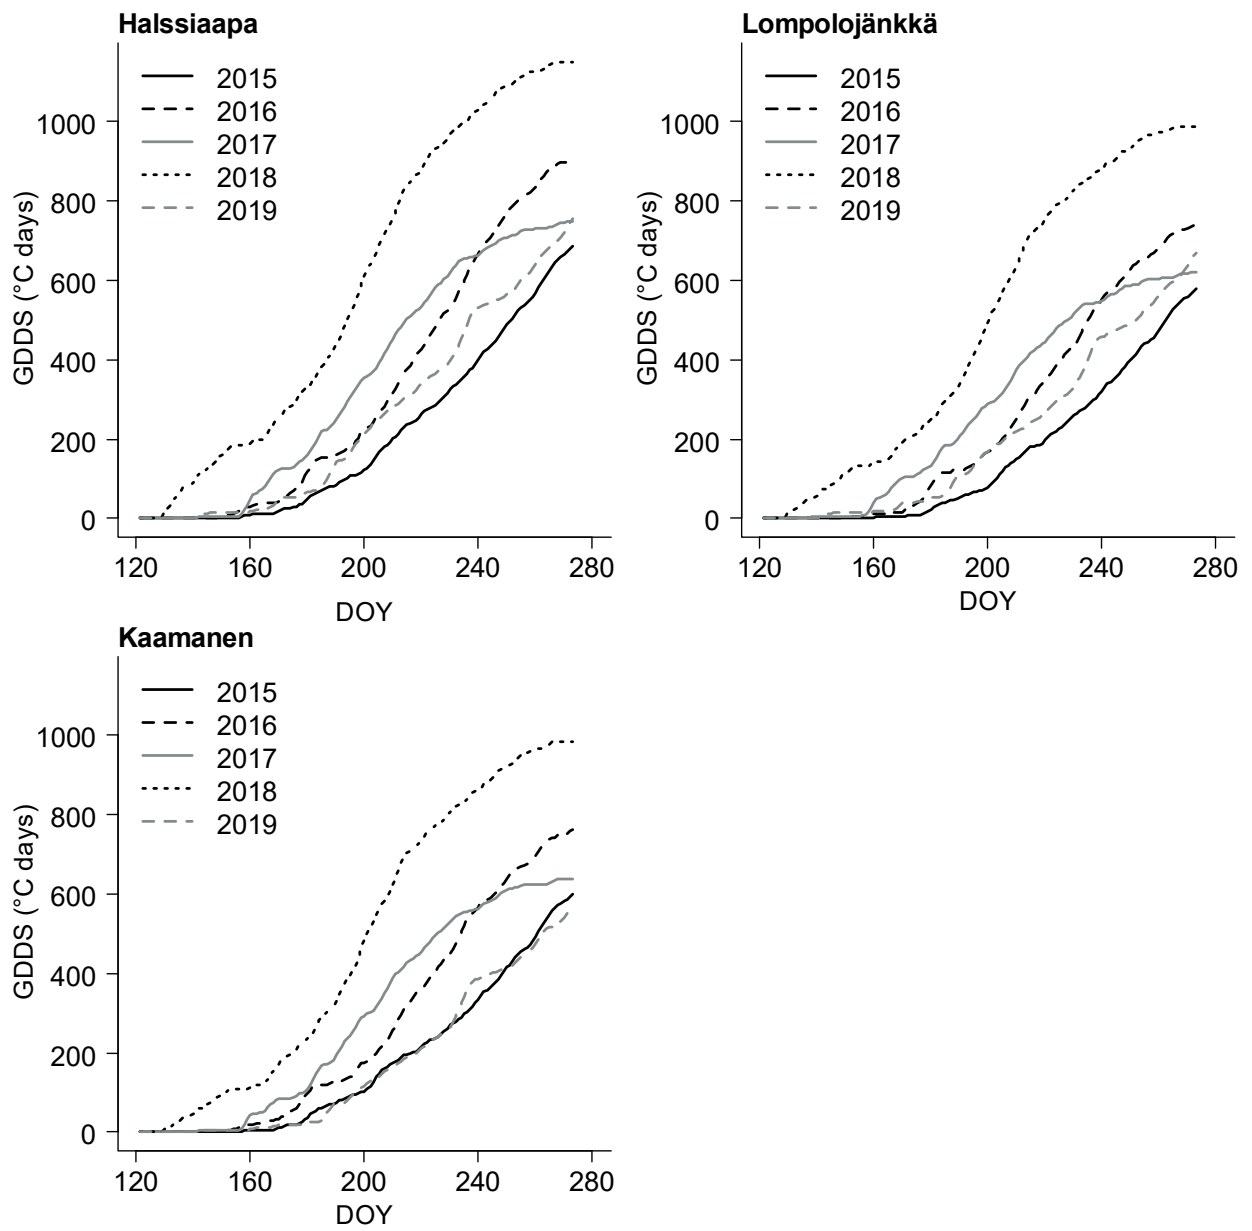

Figure S3: The growing degree day sums (GDDs) in 2015 – 2019 at the experimental sites.

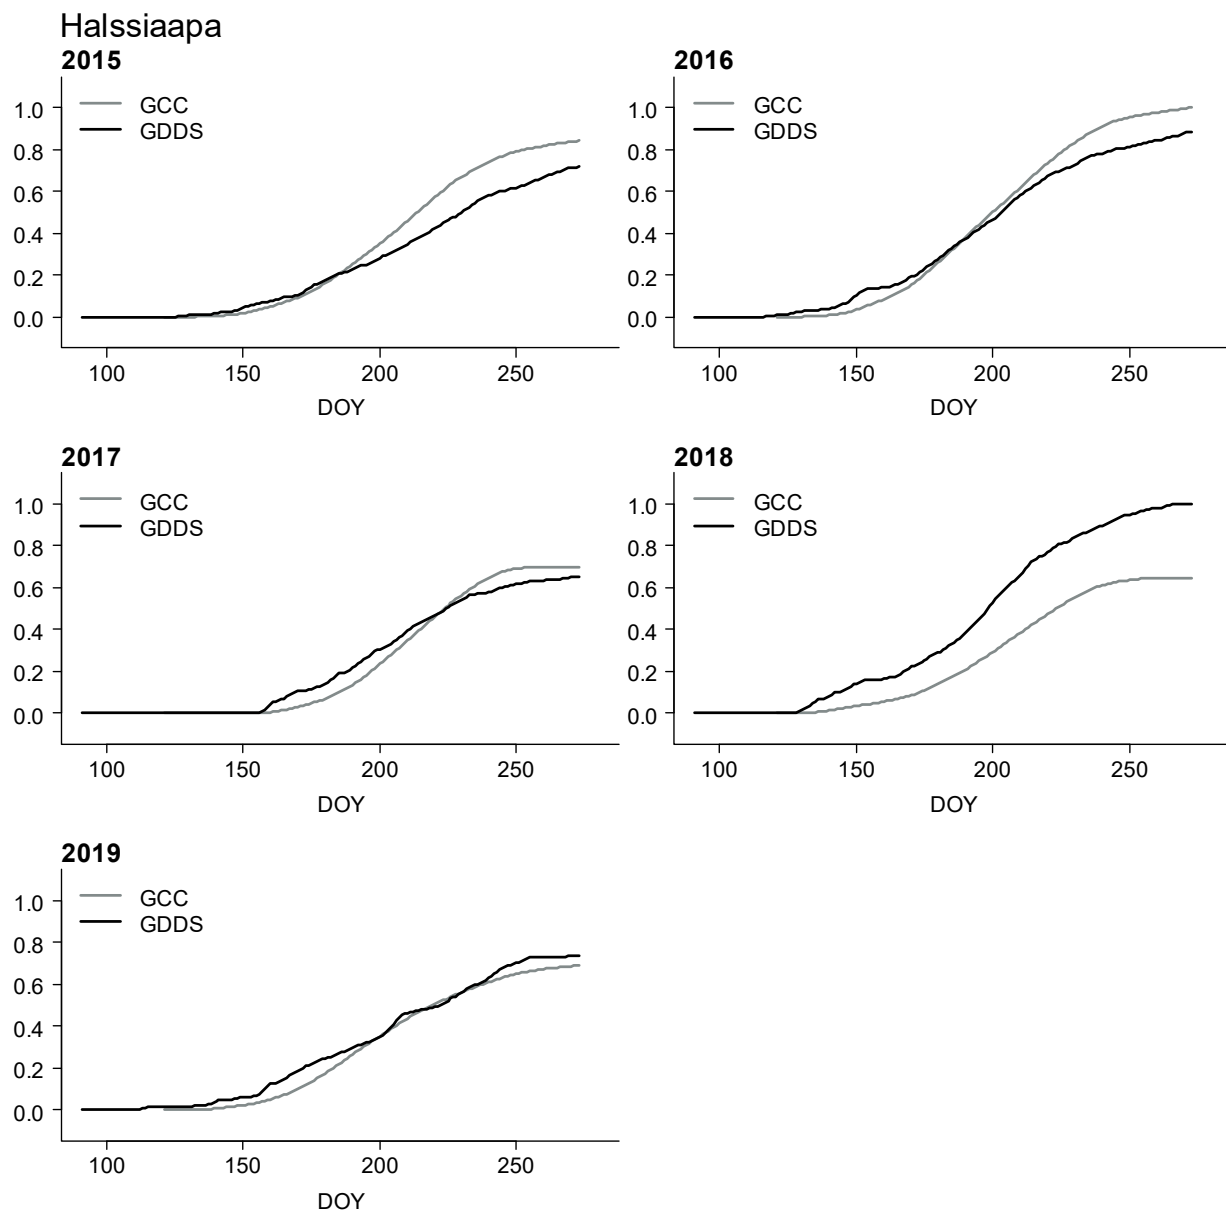

**Figure S4: The normalized cumulative GCC and growing degree days (GDDs) in 2015 – 2019 at the experimental sites.**

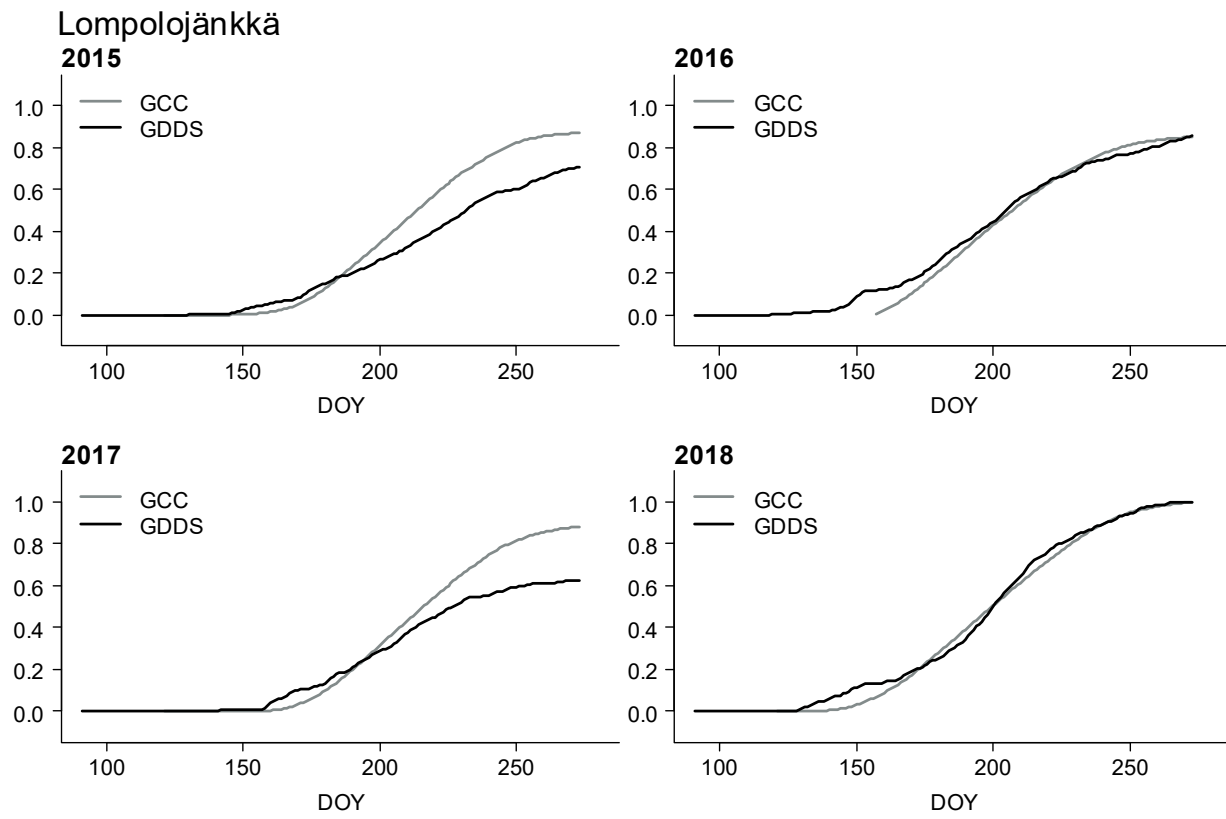

**Figure S5: The normalized cumulative GCC and growing degree days (GDDs) in 2015 – 2019 at the experimental sites. The data from 2019 is missing.**

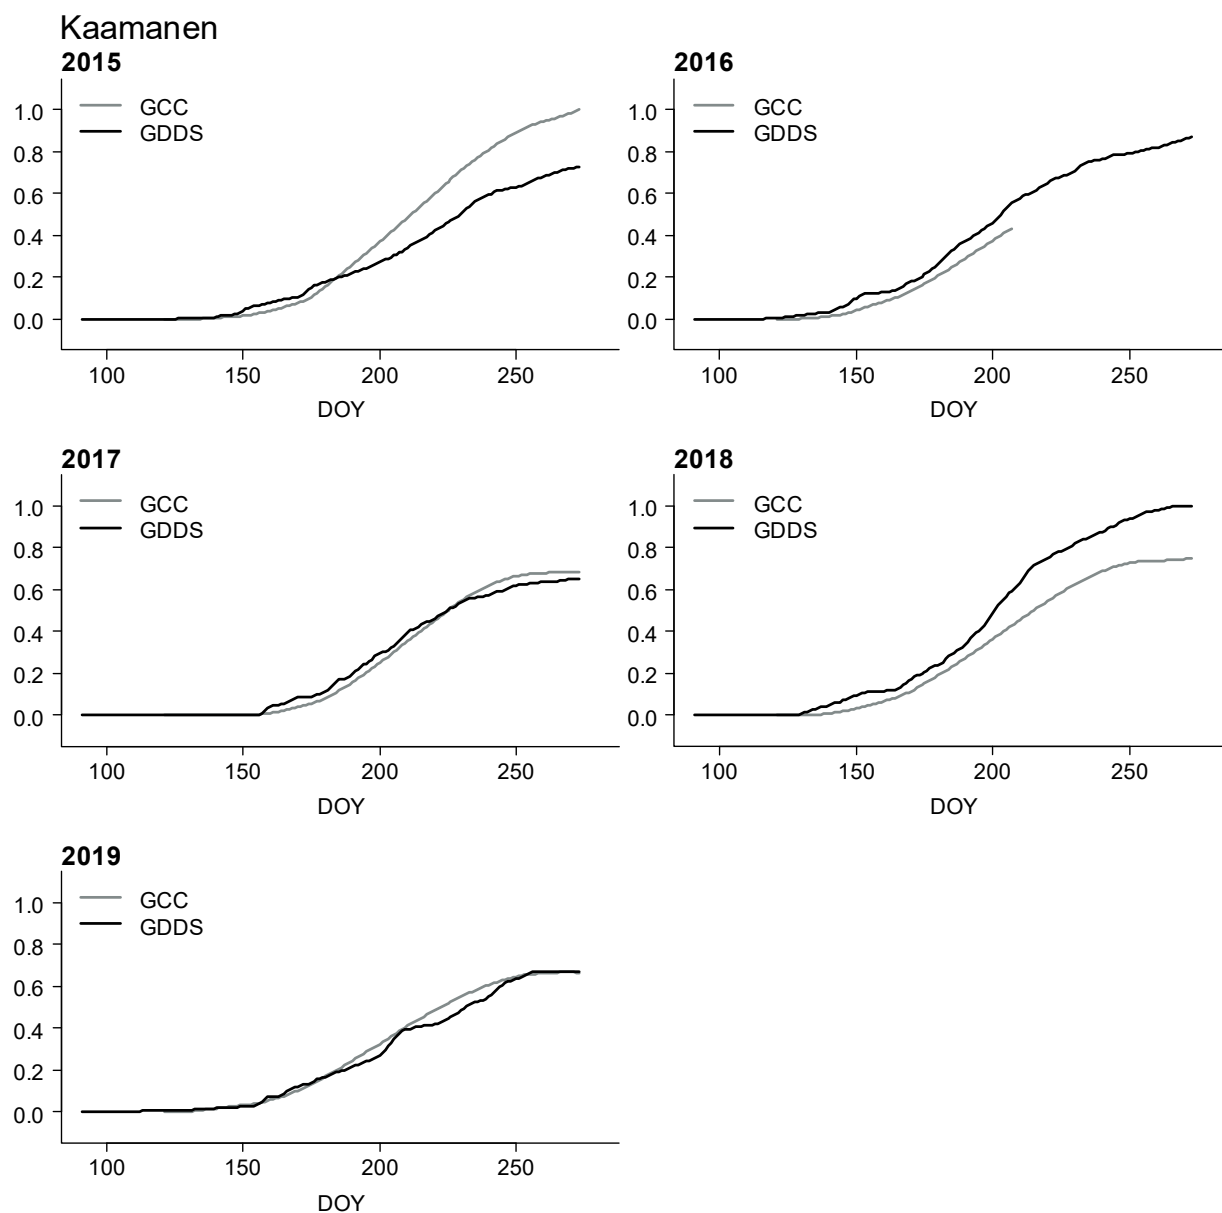

Figure S6: The normalized cumulative GCC and growing degree days (GDDs) in 2015 – 2019 at the experimental sites.

Table S5. The significant differences of mean three-day difference in GCC divided to temperature classes (<5 °C, 5–10 °C, >10 °C) between the sites as groupwise comparison (Kruskal-Wallis one-way analysis of variance on ranks).  $\chi^2$  denotes the chi-squared test statistic.

| Temperature class < 5 °C |          |         | Temperature class 5-10 °C |          |                       | Temperature class > 10 °C |          |                       |
|--------------------------|----------|---------|---------------------------|----------|-----------------------|---------------------------|----------|-----------------------|
| Month                    | $\chi^2$ | p-value | Month                     | $\chi^2$ | p-value               | Month                     | $\chi^2$ | p-value               |
| May                      | 2.23     | 0.328   | May                       | 3.40     | 0.182                 | May                       | 8.66     | 0.013                 |
| June                     | 0.86     | 0.652   | June                      | 29.1     | 4.80x10 <sup>-7</sup> | June                      | 26.61    | 1.66x10 <sup>-6</sup> |
| July                     | -        | -       | July                      | 5.60     | 0.061                 | July                      | 9.25     | 0.010                 |
| August                   | -        | -       | August                    | 21.32    | 2.35x10 <sup>-5</sup> | August                    | 9.96     | 0.007                 |
| September                | 1.32     | 0.518   | September                 | 16.57    | 2.53x10 <sup>-4</sup> | September                 | 13.65    | 0.001                 |



Table S6. The significant differences of mean three-day difference in GCC divided to temperature classes (5–10 °C, >10 °C) between the sites (Halssiaapa (Hal), Lompolojänkkä (Lom) and Kaamanen (Kaa)) as a pairwise comparison (Dunn’s test). The significance values were adjusted by the Holm correction for multiple tests. Z denotes the test statistic. Temperature class < 5 °C is missing from the analysis since the groupwise comparison showed no significant differences.

Temperature class 5-10 °C

|                  | May |         | June  |         | July |         | August |         | September |         |
|------------------|-----|---------|-------|---------|------|---------|--------|---------|-----------|---------|
|                  | Z   | p-value | Z     | p-value | Z    | p-value | Z      | p-value | Z         | p-value |
| <b>Lom - Hal</b> |     |         | -5.05 | <0.001  |      |         | -1.64  | 0.102   | 1.40      | 0.161   |
| <b>Lom - Kaa</b> |     |         | -4.13 | <0.001  |      |         | 3.02   | 0.005   | 4.03      | <0.001  |
| <b>Hal - Kaa</b> |     |         | -0.99 | 0.320   |      |         | -4.48  | <0.001  | -2.61     | 0.018   |

Temperature class > 10 °C

|                  | May   |          | June  |         | July |         | August |         | September |         |
|------------------|-------|----------|-------|---------|------|---------|--------|---------|-----------|---------|
|                  | Z     | p-value  | Z     | p-value | Z    | p-value | Z      | p-value | Z         | p-value |
| <b>Lom - Hal</b> | -2.15 | 0.062    | -1.93 | 0.054   | 2.69 | 0.022   | 0.03   | 0.976   | 3.67      | <0.001  |
| <b>Lom - Kaa</b> | -2.90 | 1.10E-02 | -5.04 | <0.001  | 0.14 | 0.891   | 2.72   | 0.013   | 2.21      | 0.054   |
| <b>Hal - Kaa</b> | 1.29  | 0.198    | 3.70  | <0.001  | 2.54 | 0.022   | -2.820 | 0.014   | 1.23      | 0.218   |

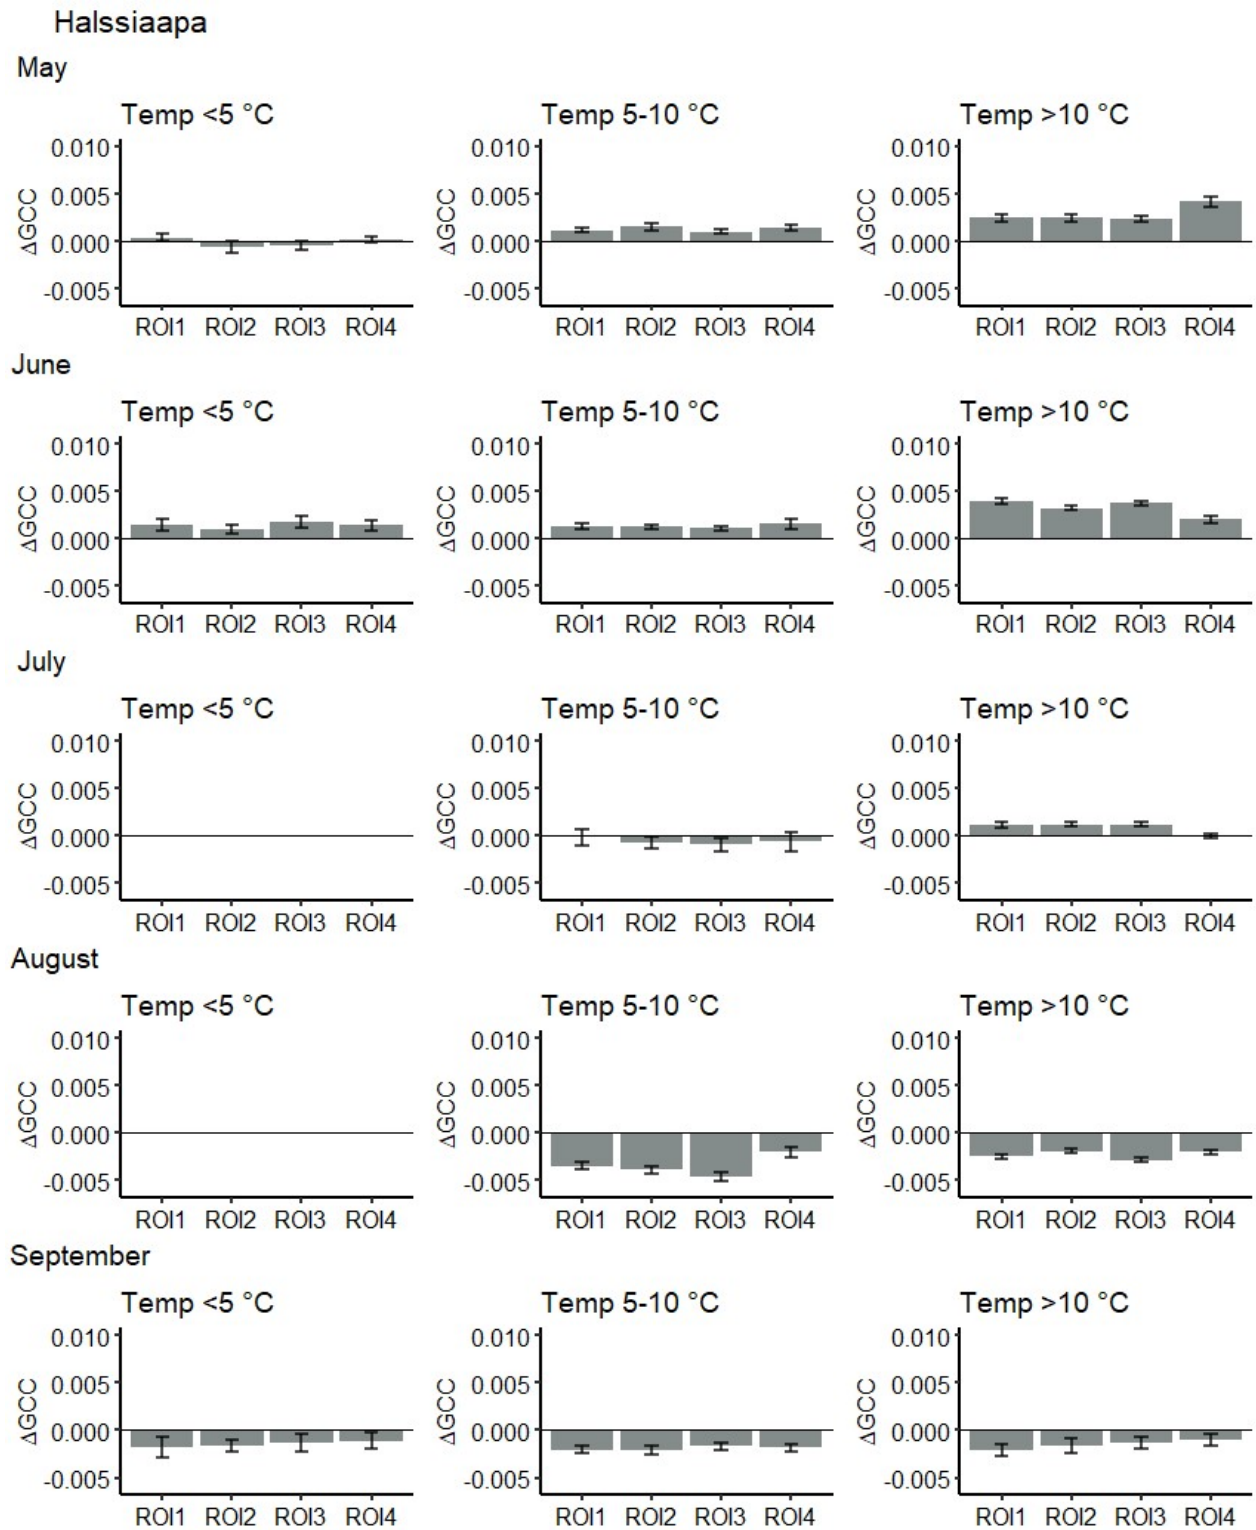

**Figure S7: Mean three-day difference in GCC divided to temperature classes (<5 °C, 5-10 °C, >10 °C) at Halsisiaapa from May to September. No temperature data in the <5 °C class in July and August. The error bars denote the standard error.**

# Lompolojänkkä

May

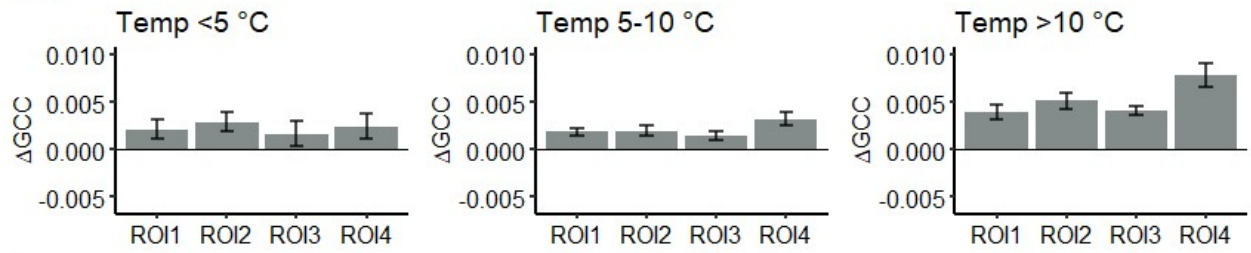

June

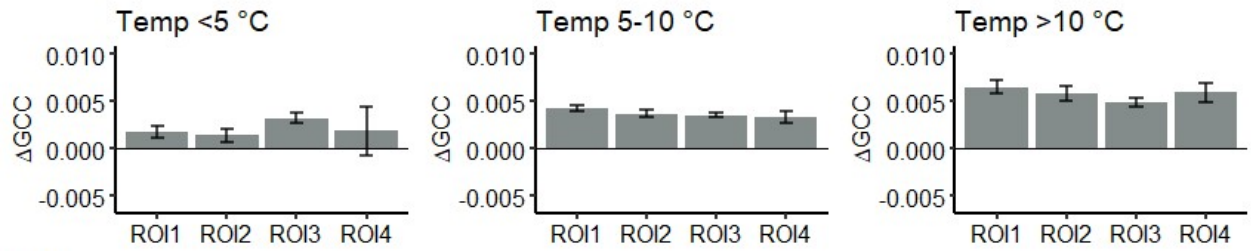

July

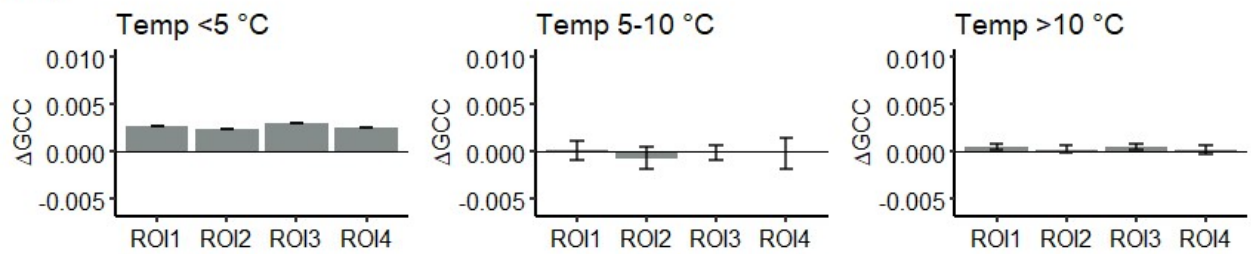

August

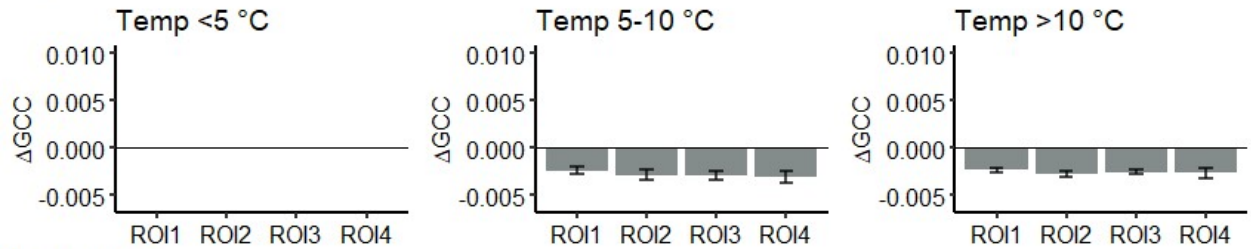

September

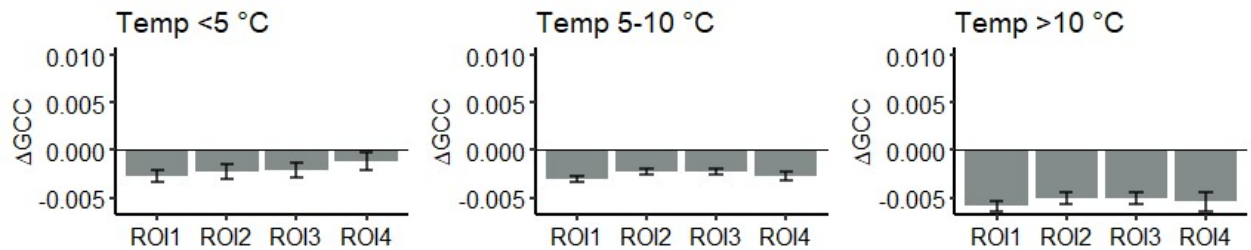

**Figure S8: Mean three-day difference in GCC divided to temperature classes (<5 °C, 5-10 °C, >10 °C) at Lompolojänkkä from May to September. No temperature data in the <5 °C class in August. The error bars denote the standard error.**

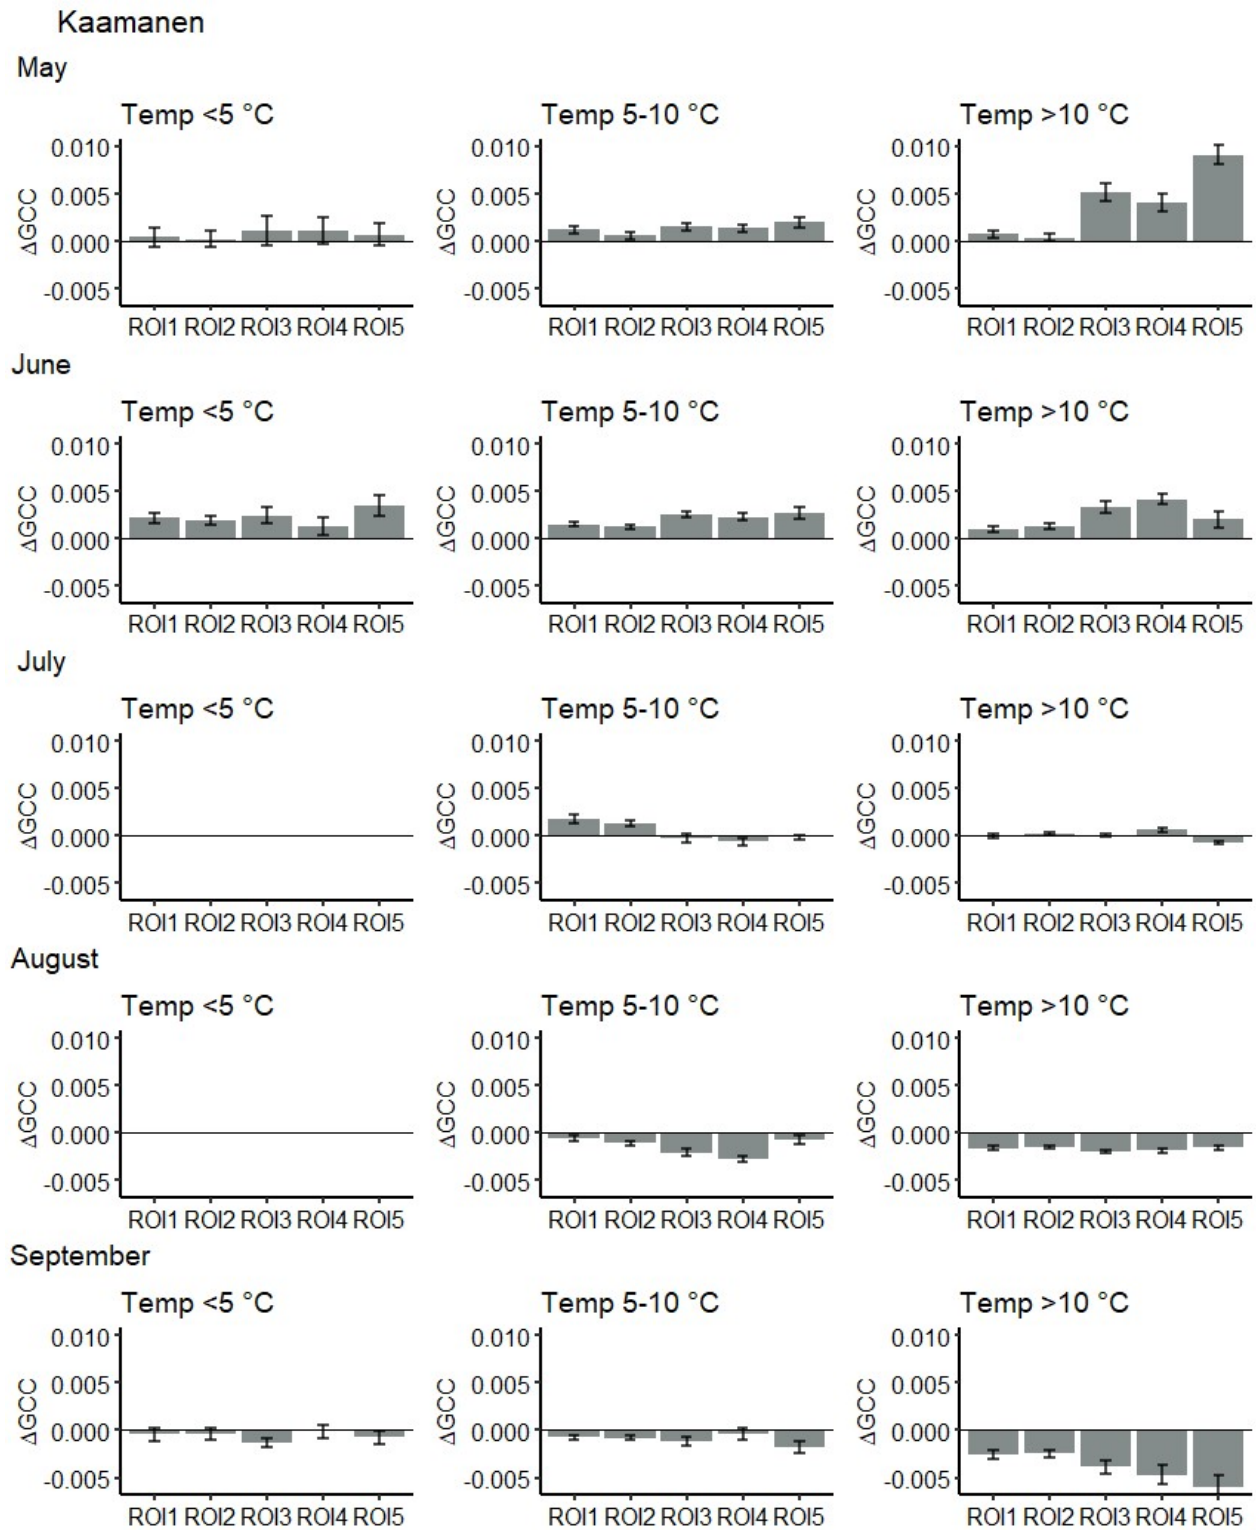

**Figure S9: Mean three-day difference in GCC divided to temperature classes (<5 °C, 5-10 °C, >10 °C) at Kaamanen from May to September. No temperature data in the <5 °C class in July and August. The error bars denote the standard error.**

**Table S7: The significant differences in GPP<sub>max</sub> between the sites during the measurement years as groupwise comparison (Kruskal-Wallis one-way analysis of variance on ranks). For interpretation, asterisk denotes significant (p < 0.05) difference among all sites.  $\chi^2$  denotes the chi-squared test statistic.**

| <b>Year</b> | <b><math>\chi^2</math></b> | <b>p-value</b>       |
|-------------|----------------------------|----------------------|
| <b>2015</b> | 9.56                       | 0.008                |
| <b>2016</b> | 12.79                      | 0.002                |
| <b>2017</b> | 4.24                       | 0.120                |
| <b>2018</b> | 7.72                       | 0.021                |
| <b>2019</b> | 27.18                      | 1.25x10 <sup>6</sup> |

**Table S8: The significant differences in GPP<sub>max</sub> between the sites (Halssiaapa (Hal), Lompolojänkkä (Lom) and Kaamanen (Kaa)) during the measurement years as a pairwise comparison (Dunn's test). The significance values were adjusted by the Holm correction for multiple tests. For interpretation, asterisk denotes significant (p < 0.05) difference between two sites. Z denotes the test statistic.**

|                  | <b>2015</b> |                | <b>2016</b> |                | <b>2017</b> |                | <b>2018</b> |                | <b>2019</b> |                |
|------------------|-------------|----------------|-------------|----------------|-------------|----------------|-------------|----------------|-------------|----------------|
|                  | <b>Z</b>    | <b>p-value</b> |
| <b>Lom - Hal</b> | -1.92       | 0.109          | 0.84        | 0.403          | 0.22        | 0.827          | -0.82       | 0.396          | -0.58       | 0.559          |
| <b>Lom - Kaa</b> | -3.08       | 0.006          | -2.33       | 0.039          | -1.65       | 0.200          | -2.75       | 0.018          | -4.88       | <0.001         |
| <b>Hal - Kaa</b> | 1.21        | 0.225          | 3.51        | 0.001          | 1.89        | 0.177          | 1.42        | 0.311          | 4.25        | <0.001         |

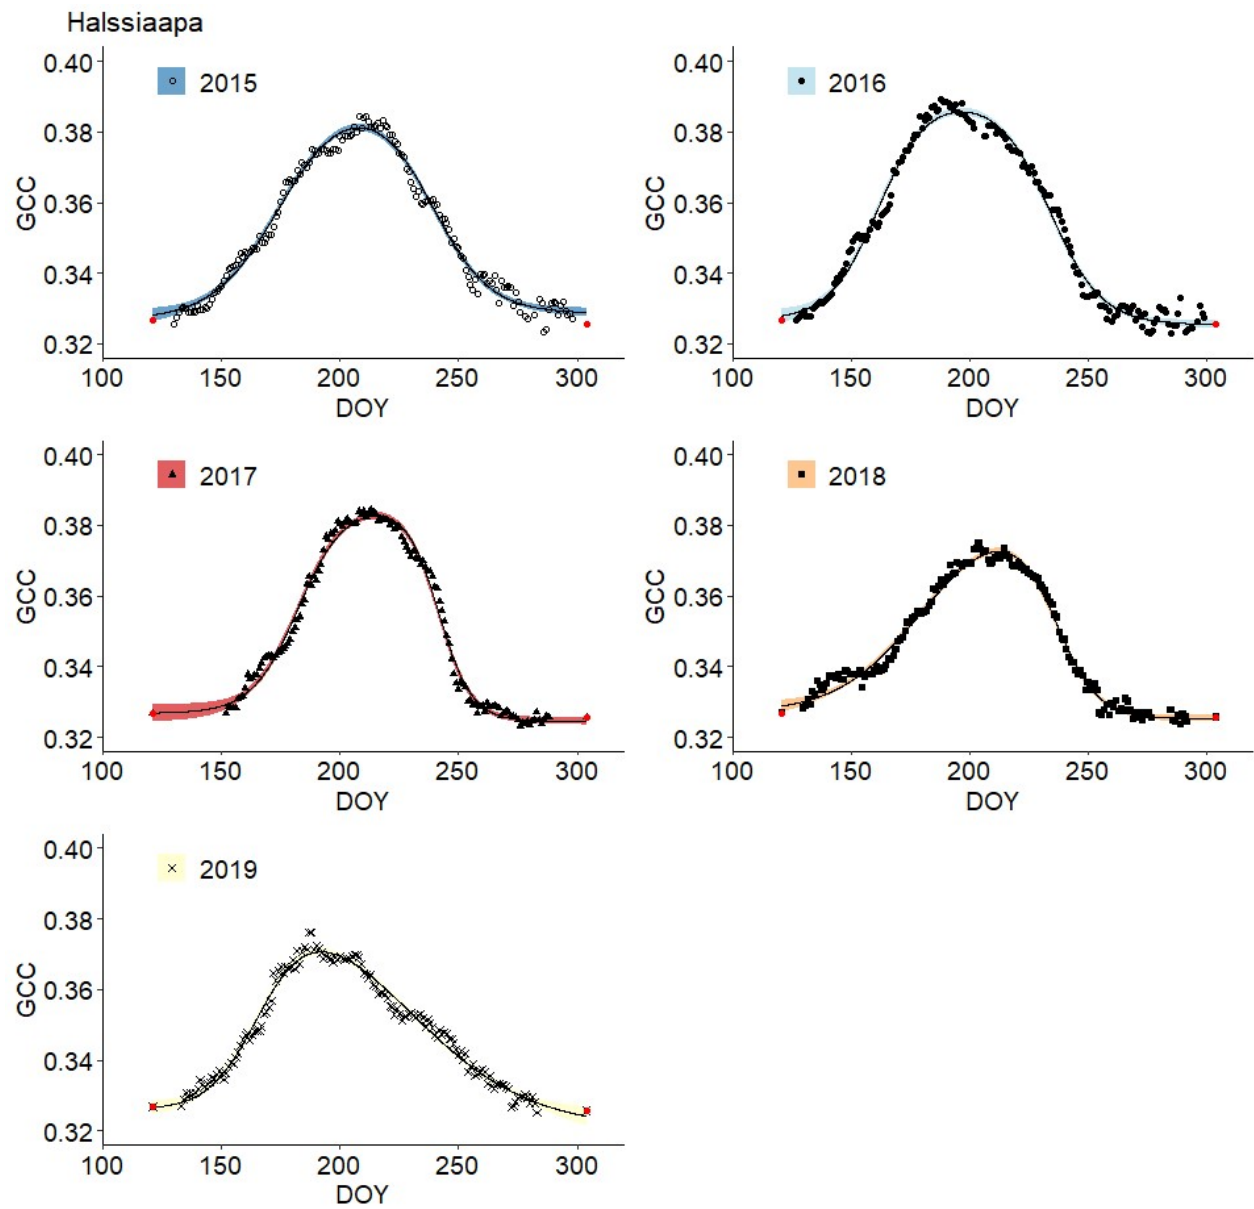

**Figure S10: The GCC values and fitted function with the 95 % confidence intervals in 2015 – 2019 at Halssiaapa. The red dots indicate the fixed start and end points in the fitting.**



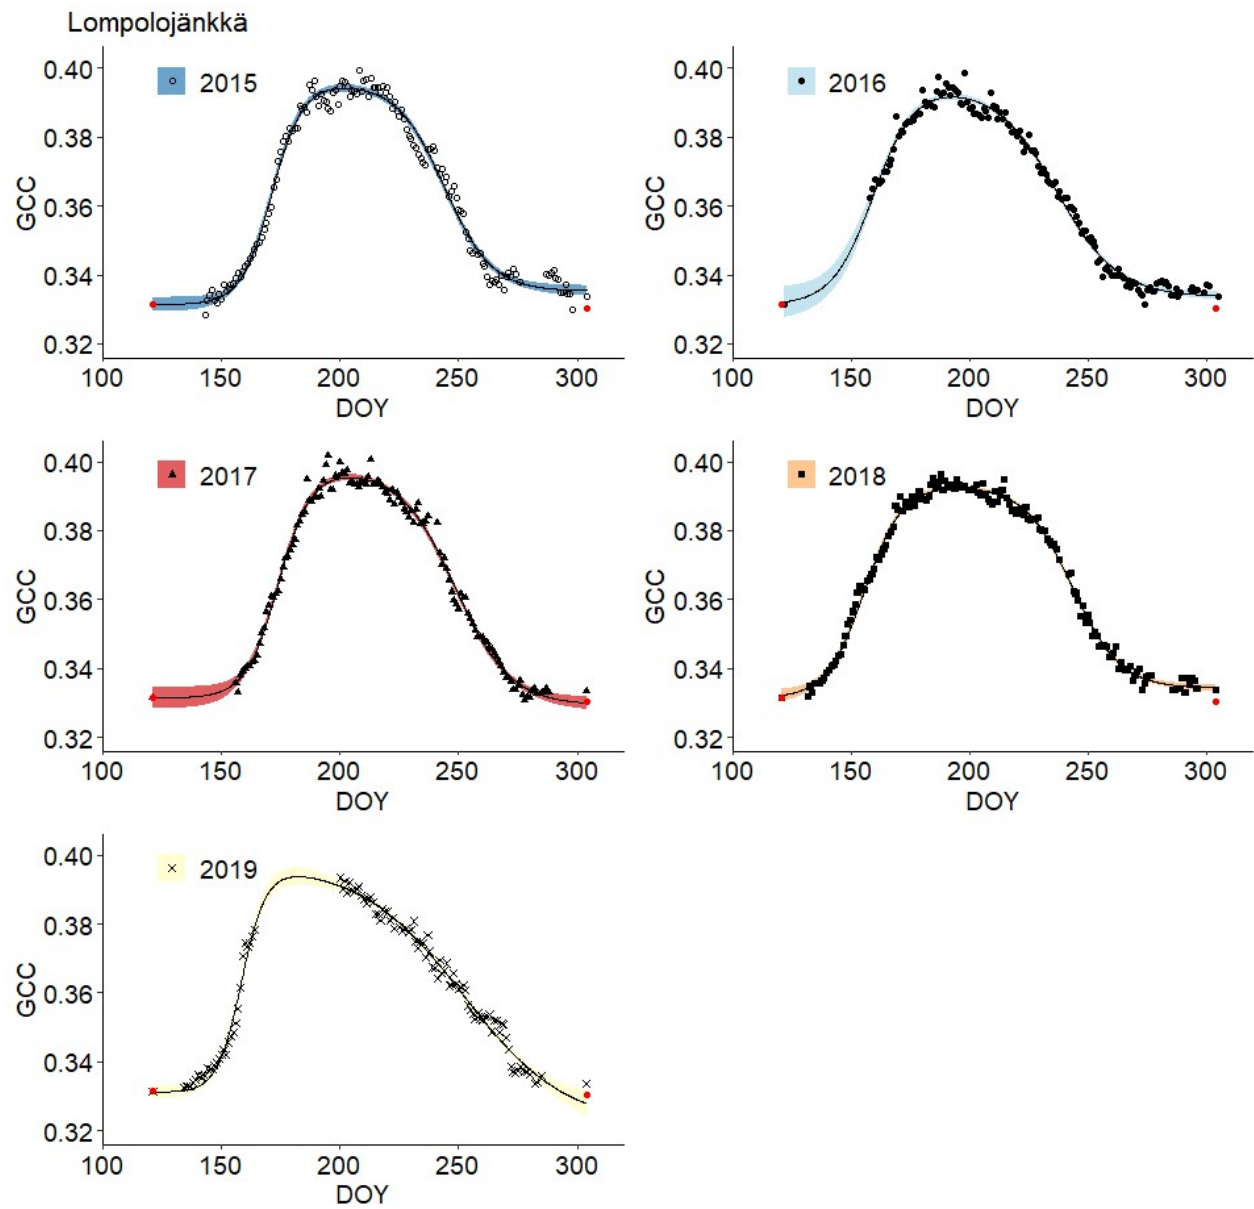

**Figure S11: The GCC values and fitted function with the 95 % confidence intervals in 2015 – 2019 at Lompolojänkä. The red dots indicate the fixed start and end points in the fitting.**

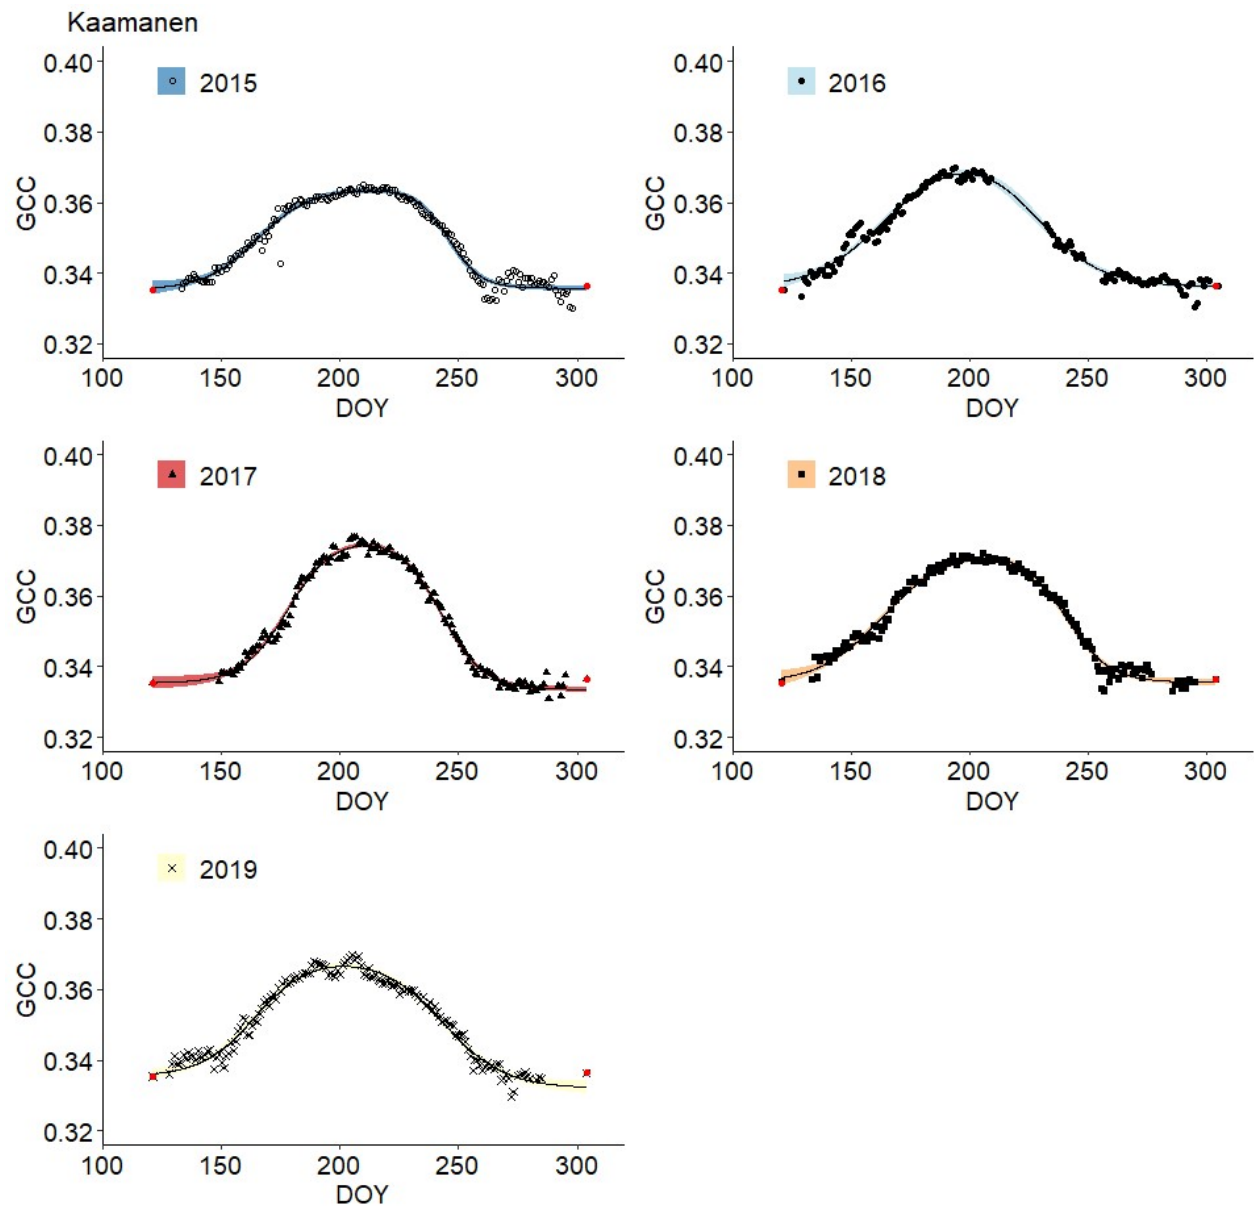

Figure S12: The GCC values and fitted function with the 95 % confidence intervals in 2015 – 2019 at Kaamanen. The red dots indicate the fixed start and end points in the fitting.



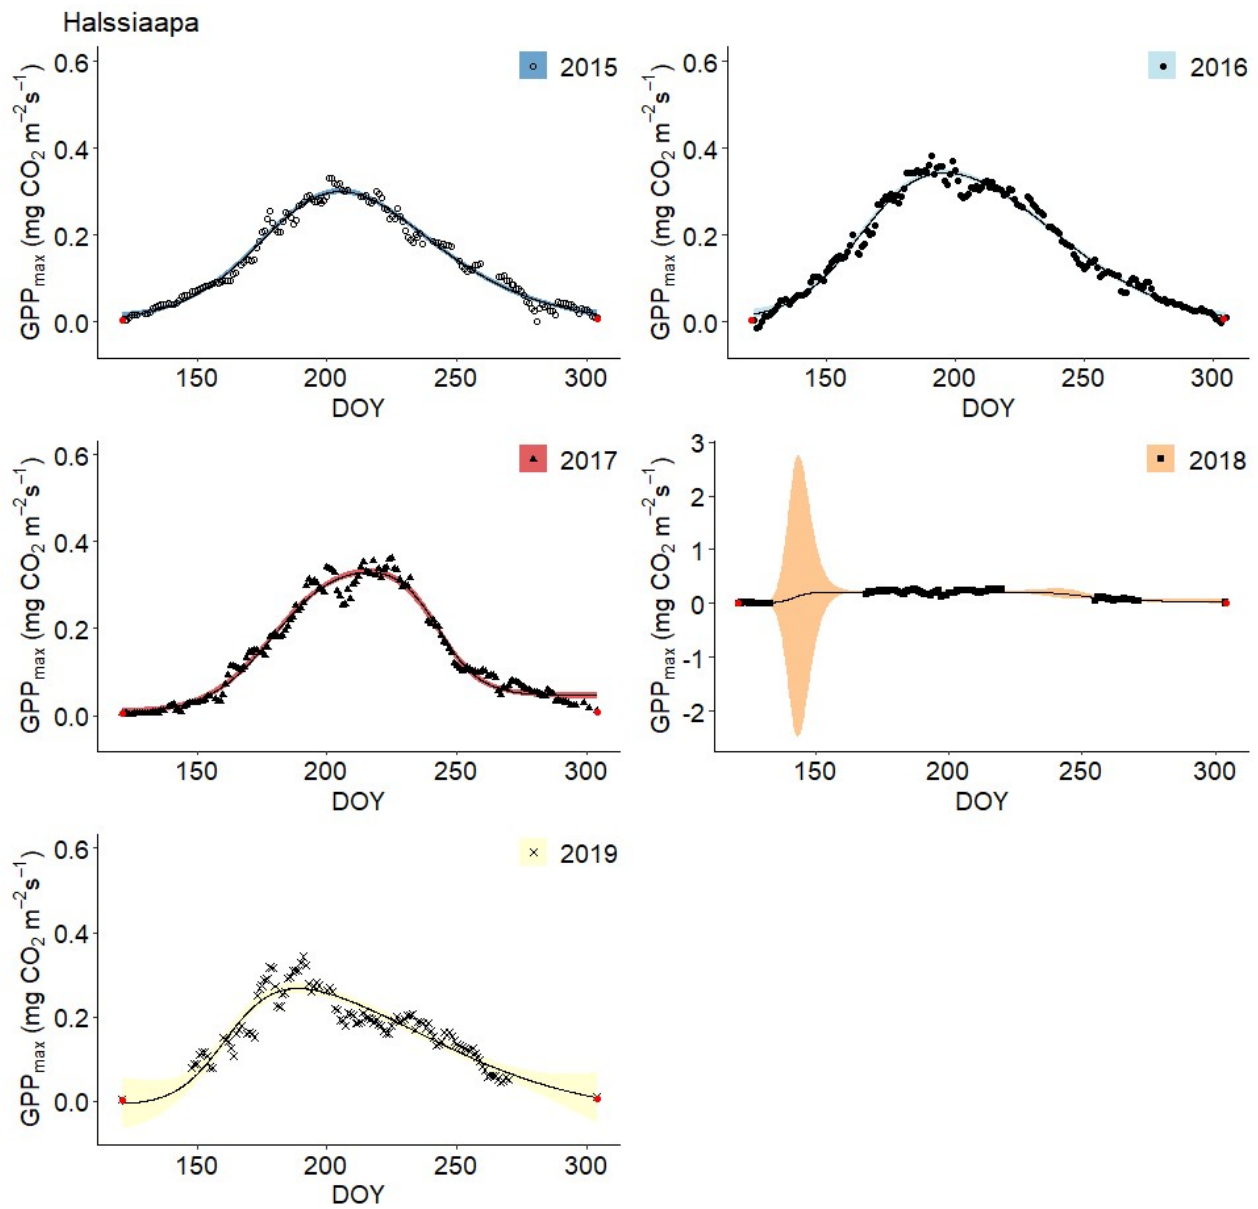

**Figure S13: The GPP<sub>max</sub> values and fitted function with the 95 % confidence intervals in 2015 – 2019 at Halssiaapa. Note the different scale in 2018. The red dots indicate the fixed start and end points in the fitting.**

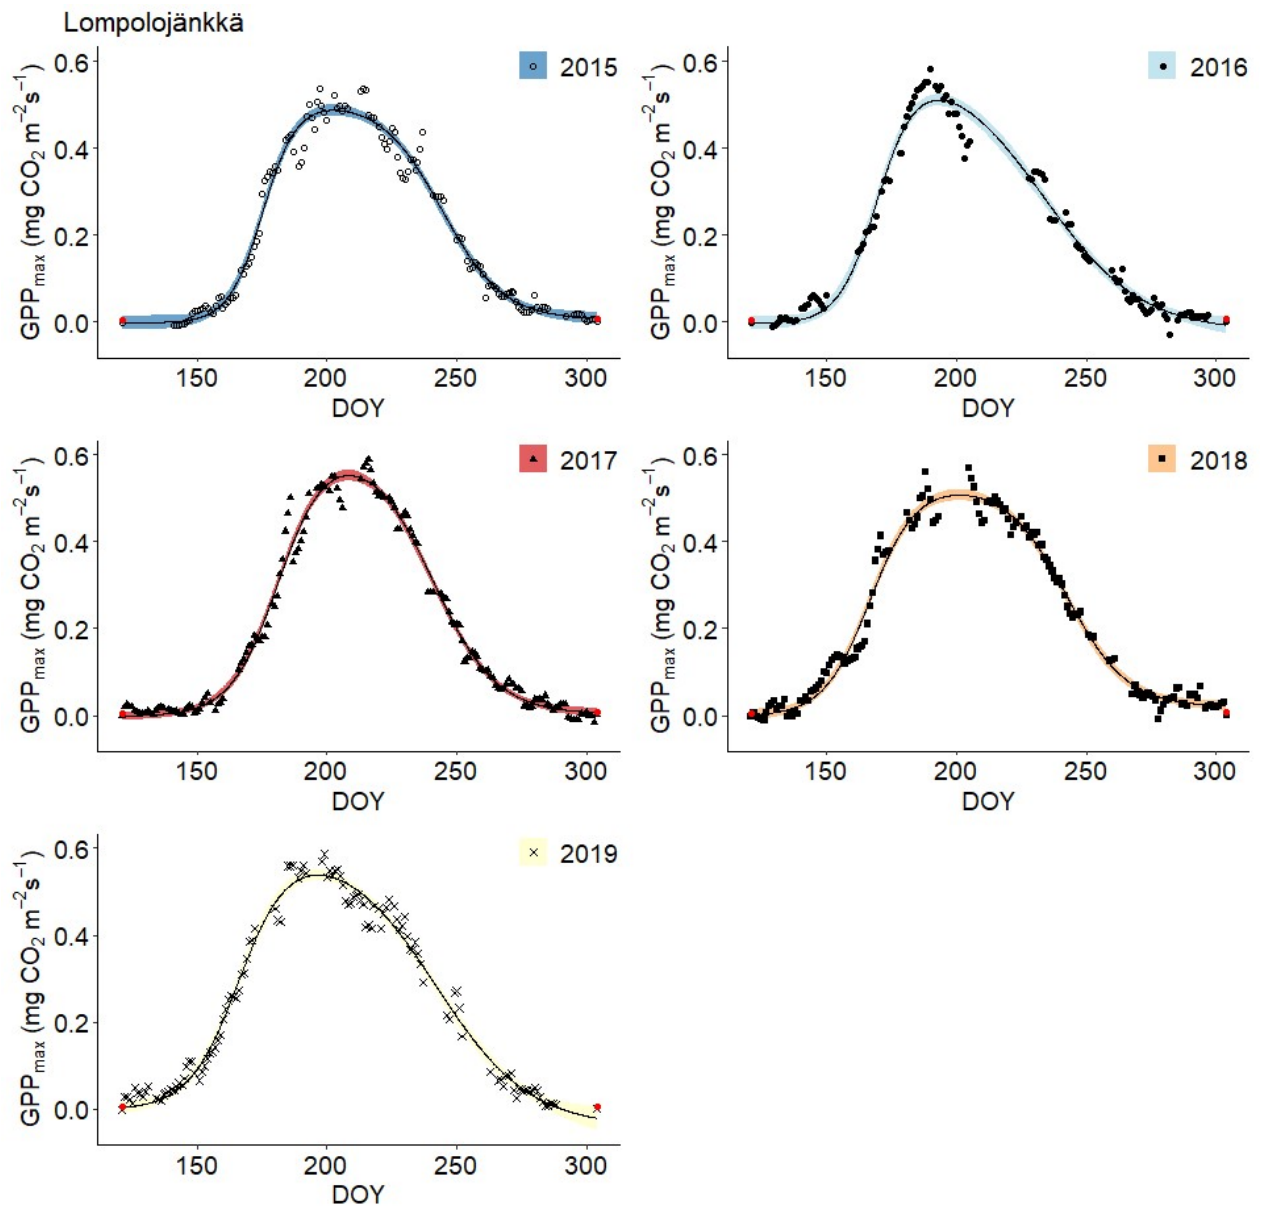

Figure S14: The GPP<sub>max</sub> values and fitted function with the 95 % confidence intervals in 2015–2019 at Lompolojänkä. The red dots indicate the fixed start and end points in the fitting.

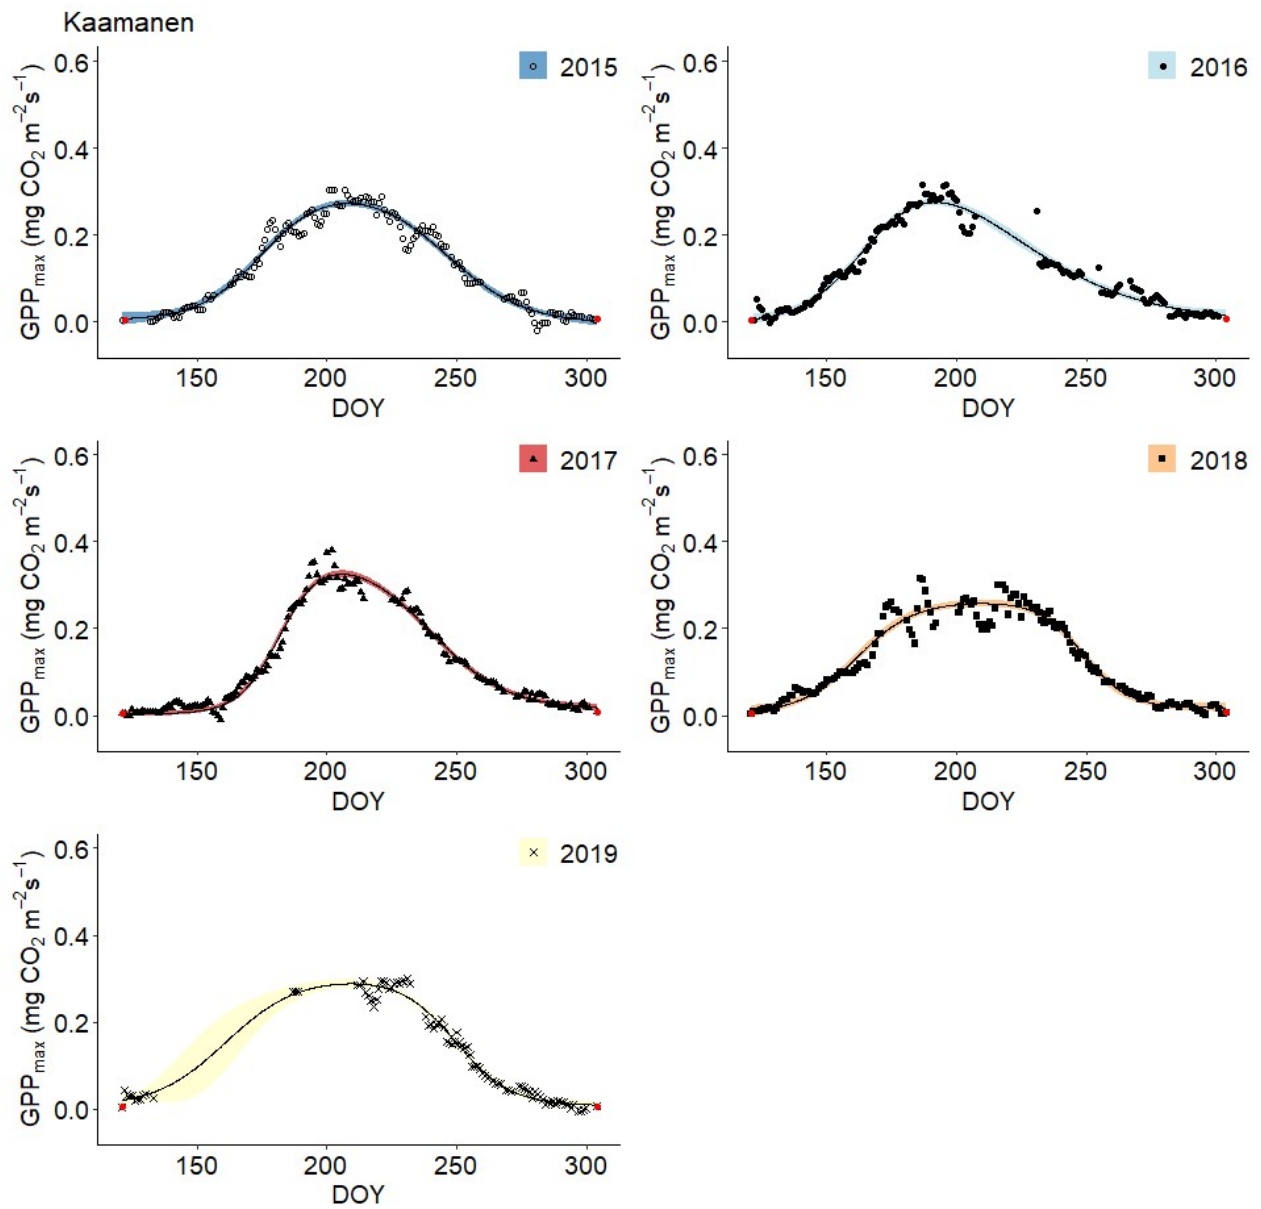

**Figure S15: The GPP<sub>max</sub> values and fitted function with the 95 % confidence intervals in 2015 – 2019 at Kaamanen. The red dots indicate the fixed start and end points in the fitting.**

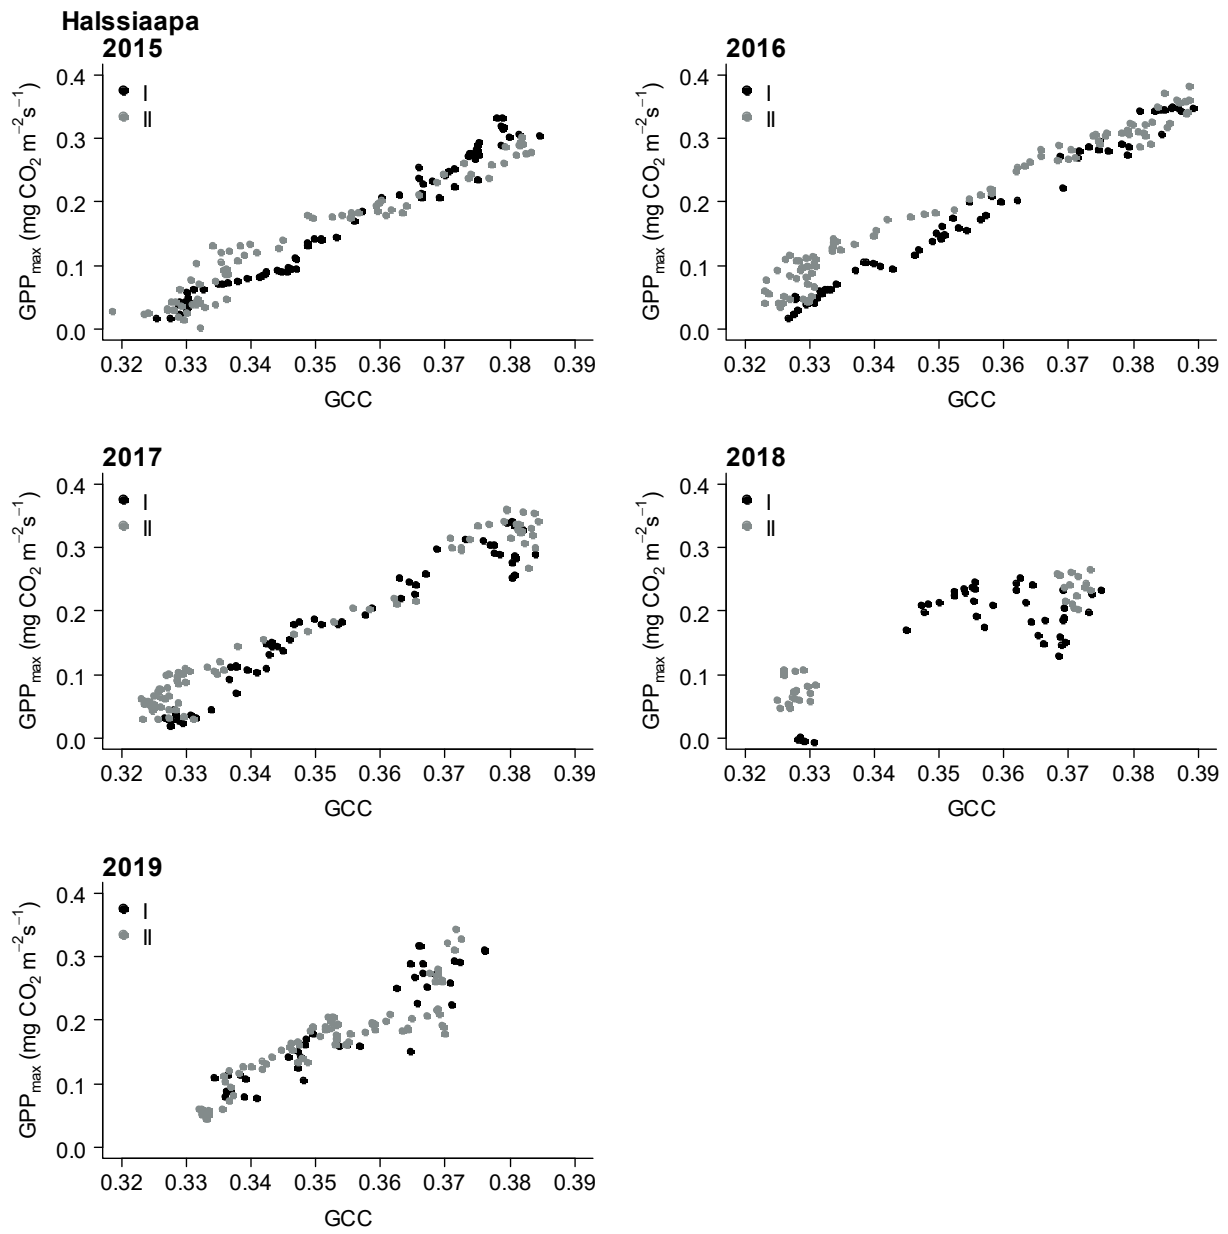

**Figure S16:** The relationship between GCC and  $GPP_{max}$  at Halssiaapa in 2015–2019. The first part of the growing season is denoted with black circles, the latter half with red circles.

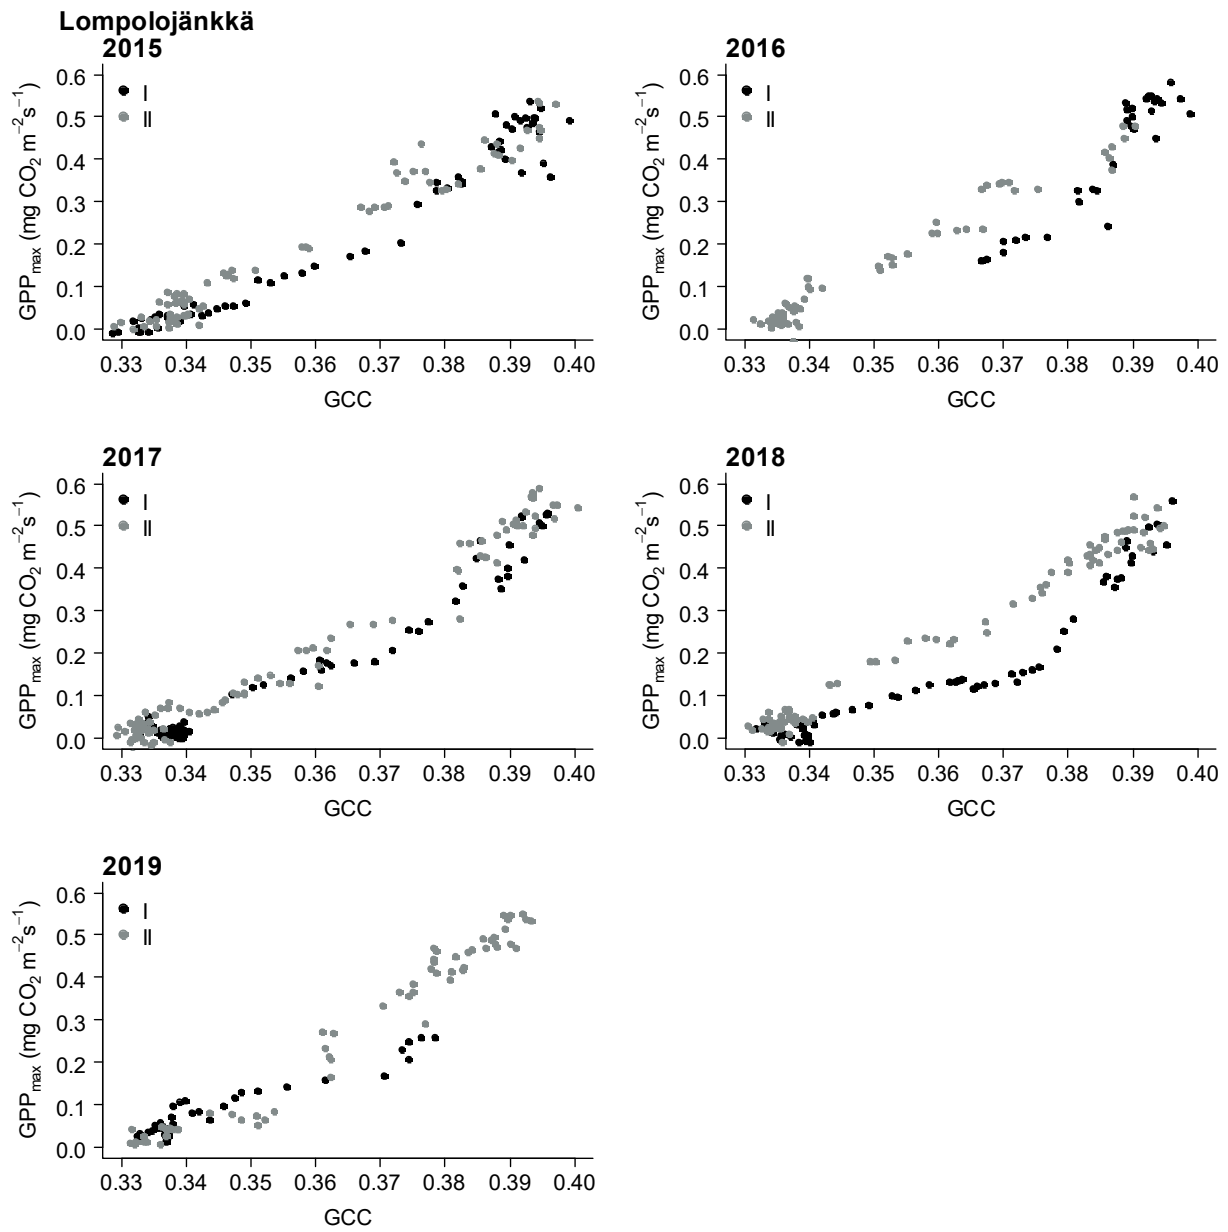

**Figure S17:** The relationship between GCC and  $GPP_{max}$  at Lompolojänkkä in 2015–2019. The first part of the growing season is denoted with black circles, the latter half with red circles.

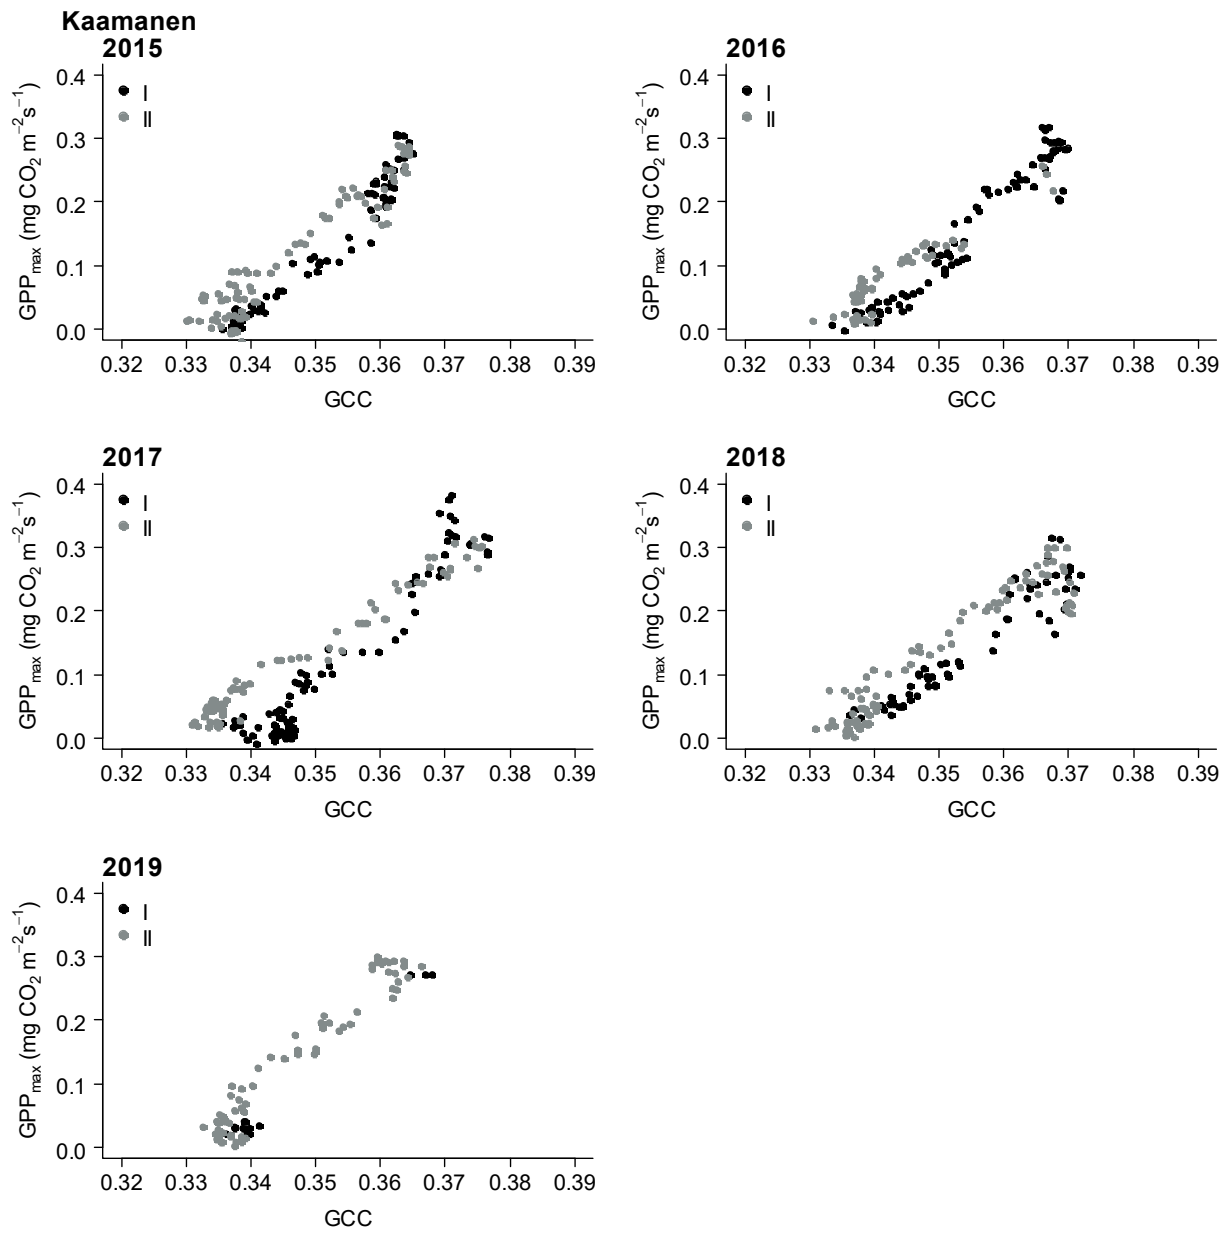

**Figure S18:** The relationship between GCC and GPP<sub>max</sub> at Kaamanen in 2015–2019. The first part of the growing season is denoted with black circles, the latter half with red circles.

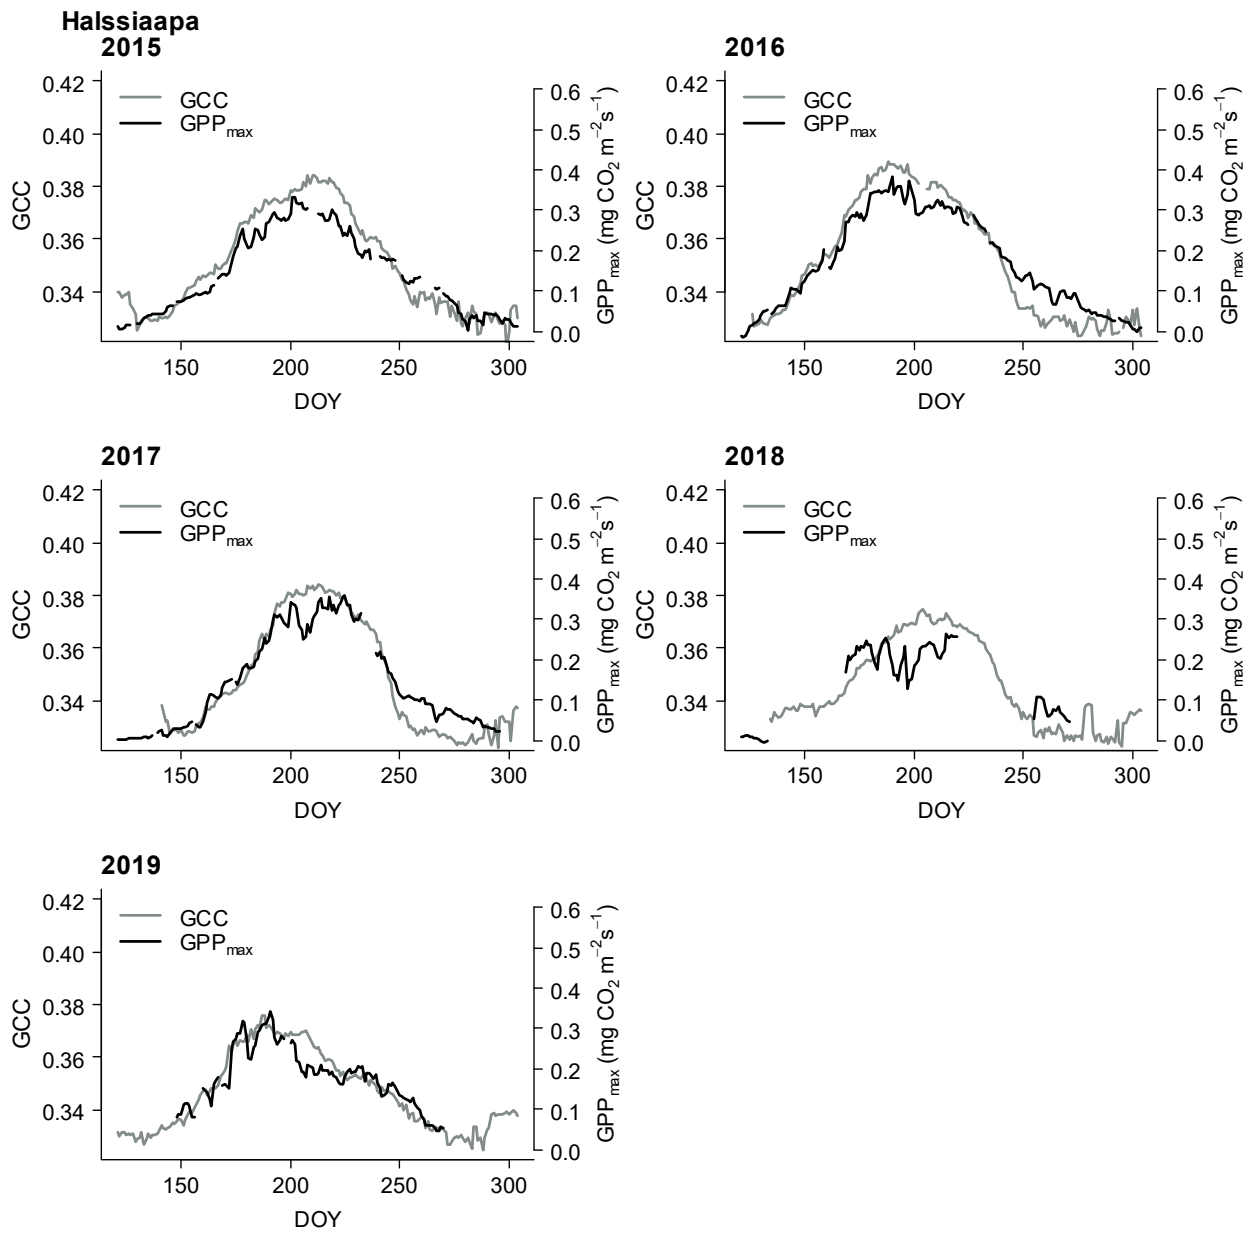

Figure S19: The scaled GCC and  $GPP_{max}$  data at Halssiaapa in 2015–2019.

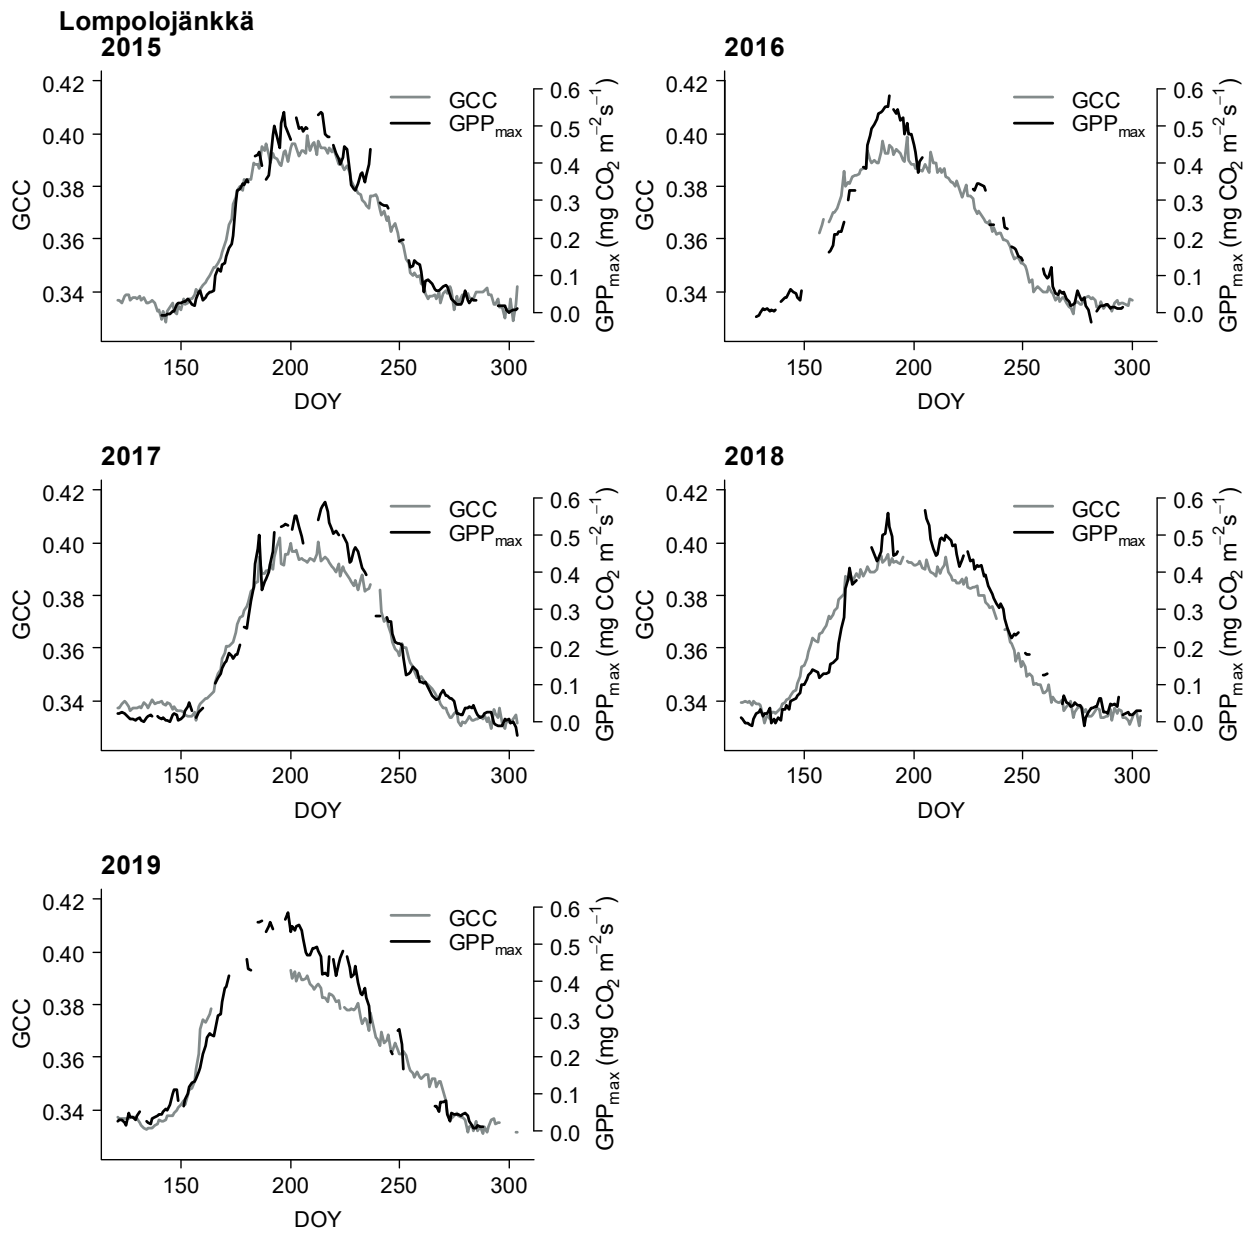

Figure S20: The scaled GCC and  $GPP_{max}$  data at Lompolojänkkä in 2015–2019.



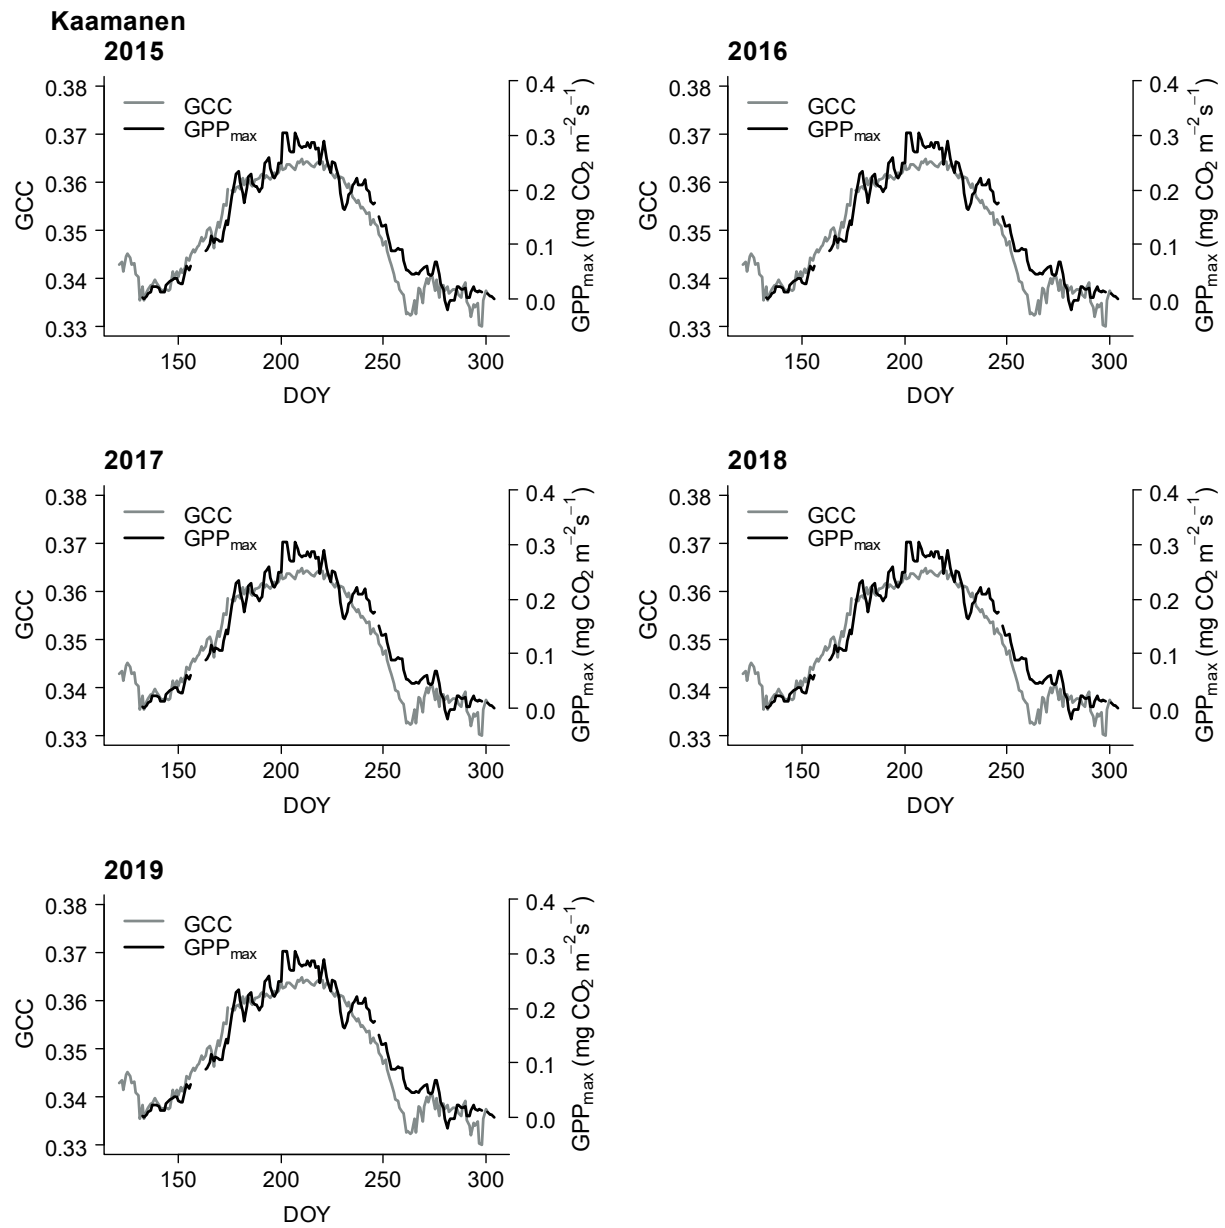

**Figure S21: The scaled GCC and  $GPP_{max}$  data at Kaamanen in 2015–2019.**

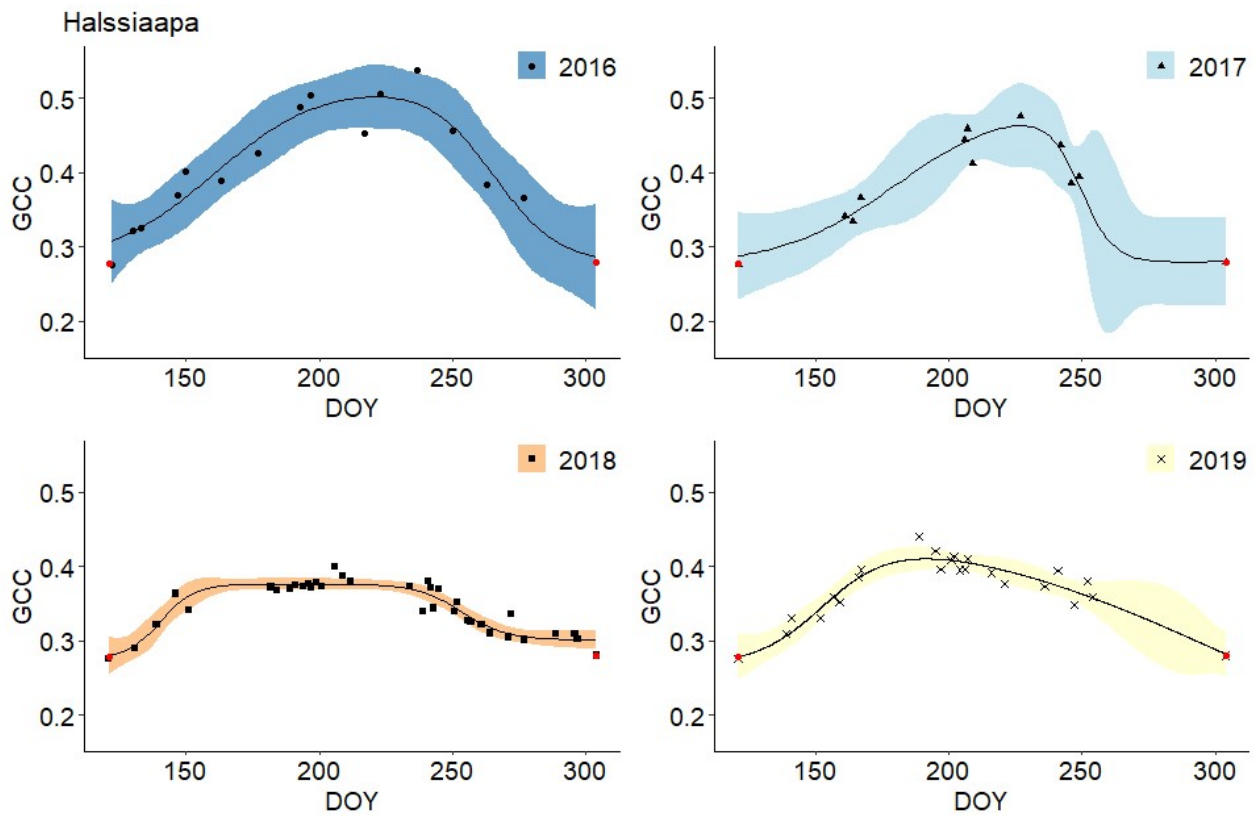

Figure S22: The Sentinel-2 derived GCC values and fitted function with the 95 % confidence intervals in 2016 – 2019 at Halssiaapa. The red dots indicate the fixed start and end points in the fitting.

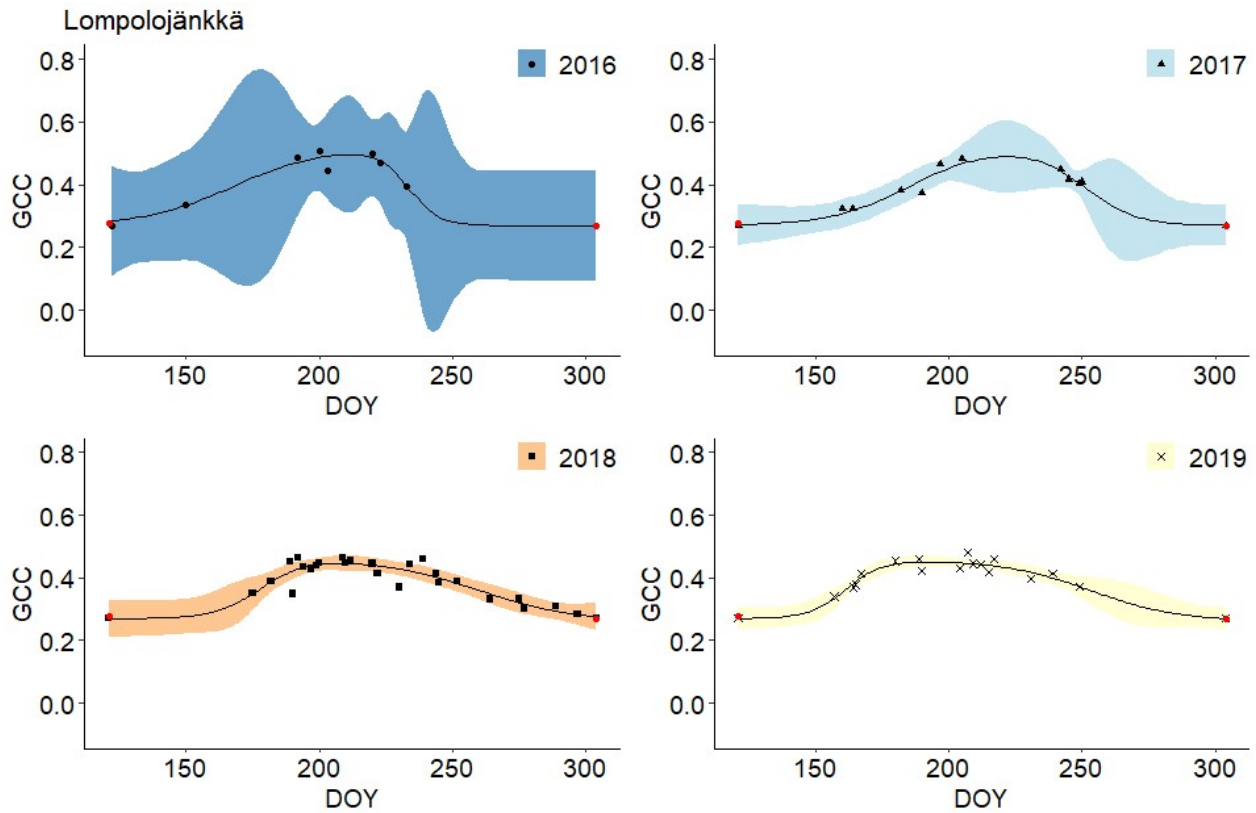

Figure S23: The Sentinel-2 derived GCC values and fitted function with the 95 % confidence intervals in 2016 – 2019 at Lompolojänkkä. The red dots indicate the fixed start and end points in the fitting.

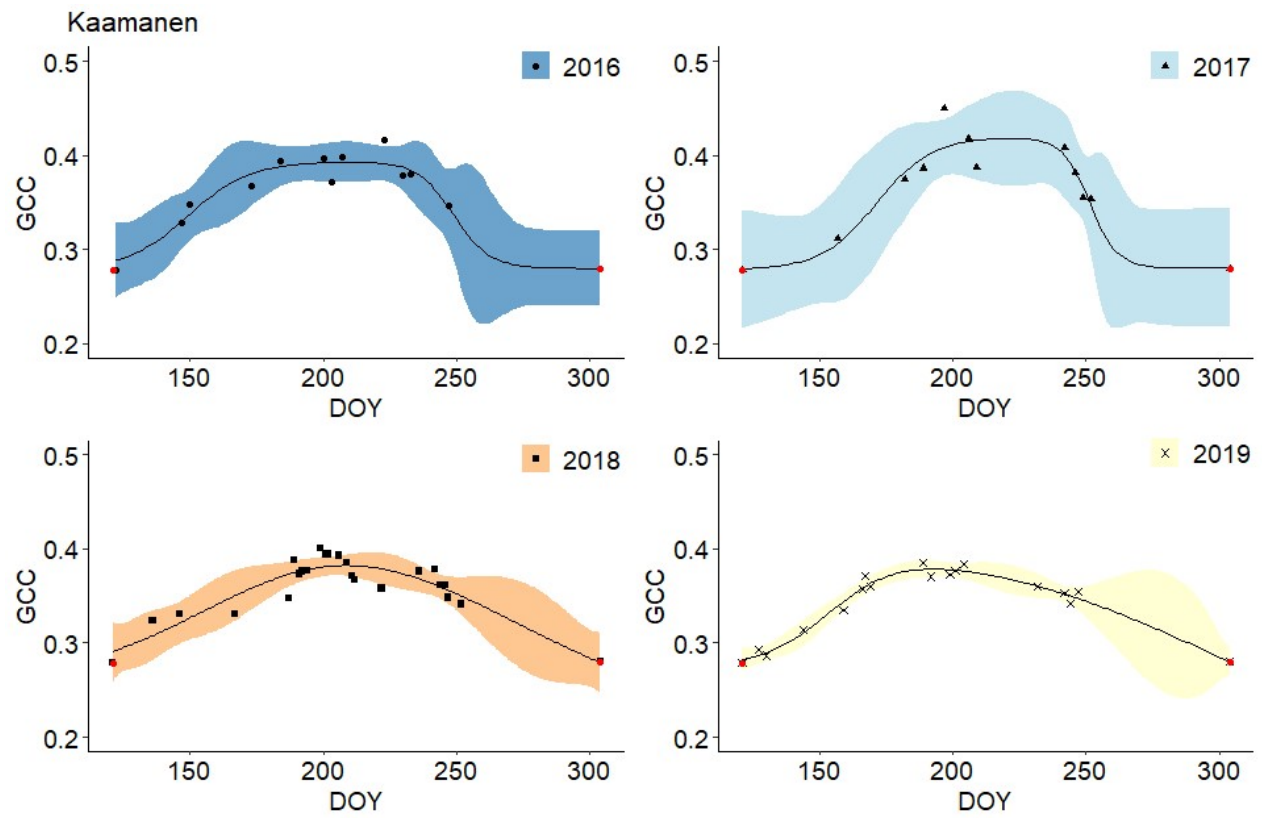

**Figure S24: The Sentinel-2 derived GCC values and fitted function with the 95 % confidence intervals in 2016 – 2019 at Kaamanen. The red dots indicate the fixed start and end points in the fitting.**
